# Supplementary material for: Investigation of Cinnamaldehyde Derivatives as Potential Organic UV Filters
Source: Hindawi journal article supplement (doi:10.1155/2022/7010428), 2022-03-14
Supplement: f1 [file 7010428.f1.docx]

Summary of the synthesized organic UV filters including the IUPAC name, structure, and number notation.

| **Aldol Product** | | **Structure** |
| --- | --- | --- |
| (1) | (1*E*,3*E*,6*E*,8*E*)-1,9-diphenylnona-1,3,6,8-tetraen-5-one |  |
| (2) | (1*E*,3*E*,6*E*,8*E*)-2,8-dimethyl-1,9-diphenylnona-1,3,6,8-tetraen-5-one |  |
| (3) | (2*E*,6*E*)-2,6-bis[(2*E*)-3-phenylprop-2-en-1-ylidene]cyclohexan-1-one |  |
| (4) | (2*E*,6*E*)-4-methyl-2,6-bis[(2*E*)-3-phenylprop-2-en-1-ylidene]cyclohexan-1-one |  |
| (5) | (2*E*,5*E*)-2,5-bis[(2*E*)-3-phenylprop-2-en-1-ylidene]cyclopentan-1-one |  |

**(1*E*,3*E*,6*E*,8*E*)-1,9-diphenylnona-1,3,6,8-tetraen-5-one:** *(E)*-3-phenylprop-2-enal (3.13 mL)**,** cinnamaldehyde, was mixed with 0.90 mL of acetone in a 125 mL Erlenmeyer flask and stirred at room temperature. In a separate 125 mL Erlenmeyer flask, 2.51 g of sodium hydroxide (NaOH) was dissolved using deionized water (25.01 mL) and ethanol (20.02 mL). Once the NaOH pellets were completely dissolved, the solution was cooled to 20 °C in an ice water bath. Approximately 2 mL of the cinnamaldehyde and acetone solution was added to the NaOH, deionized water, and ethanol solution. After 15 minutes of stirring at room temperature, the other half of the cinnamaldehyde and acetone solution was added and stirred for 30 minutes at room temperature. The yellow precipitate was collected by suction filtration using a Buchner funnel. The precipitate was transferred to a 300 mL beaker, washed using approximately 150 mL of deionized water, and filtered again through suction filtration. The crude product was then placed into a 500 mL Erlenmeyer flask and was recrystallized using 100 mL of ethanol. Following the recrystallization process, the crystals were suctioned filtered and washed with cold ethanol. The recrystallized product was chromatographed on silica gel eluted with 25% ethyl acetate-hexane. The total yield of the product was 39.4 % with a Rf value of 0.62 and measured melting point of 142.7 °C.

**(1*E*,3*E*,6*E*,8*E*)-2,8-dimethyl-1,9-diphenylnona-1,3,6,8-tetraen-5-one:** *(E)*-2-methyl-3-phenylacrylaldehyde (3.49 mL), or α-methyl cinnamaldehyde, was mixed with 0.919 mL of acetone into a 125 mL Erlenmeyer flask and stirred at room temperature. Sodium hydroxide pellets (2.50 g) was dissolved in a separate 125 mL Erlenmeyer flask using 25.02 mL of H2O and 20.01 mL of ethanol. The solution was cooled to 20 °C in an ice water bath. About 2 mL of the α-methyl cinnamaldehyde and acetone solution was added to the NaOH, deionized water, and ethanol solution and stirred at room temperature. After 15 minutes of stirring, the other half of the α-methyl cinnamaldehyde and acetone solution was added to the flask and stirred overnight. A clay-like precipitate formed and was suction filtered using a Buchner funnel. The precipitate was transferred into a 300 mL beaker and was mixed with about 150 mL of deionized water until the clumps broke apart. The crude product was collected through suction filtration and placed into a 500 mL Erlenmeyer flask. Approximately 100 mL of ethanol was added to the 500 mL flask. Once crystals were formed, the product was suction filtered and washed with cold ethanol. The dried crystal product was chromatographed on silica gel eluted with 25 % ethyl acetate-hexane. The total percent yield of the product was 25.4 % with a Rf value of 0.70 and melting point of 123.8 °C.

**(2*E*,6*E*)-2,6-bis[(2*E*)-3-phenylprop-2-en-1-ylidene]cyclohexan-1-one**: *(E)*-3-phenylprop-2-enal (3.18 mL), cinnamaldehyde, was mixed with 0.130 mL of cyclohexanone in a 125 mL Erlenmeyer flask at room temperature. In a separate 125 mL Erlenmeyer flask, sodium hydroxide pellets (2.55 g) was dissolved in 25.06 mL of deionized water and 20.05 mL of ethanol. This solution was cooled to 20 °C in an ice water bath. Approximately 2 mL of the cinnamaldehyde and cyclohexanone solution was added to the NaOH, deionized water, and ethanol solution and stirred for 15 minutes at room temperature. The other half of the cinnamaldehyde and cyclohexanone solution was added to the flask and stirred for 30 minutes at room temperature. Theyellow precipitate formed and was suction filtered using a Buchner funnel. The precipitate was placed in a 300 mL beaker, dissolved in approximately 150 mL of deionized water, and suction filtered. The crude product was placed in a 500 mL Erlenmeyer flask and approximately 100 mL of ethanol was added. Once the recrystallization process was completed, the solution was suction filtered and washed with cold ethanol. The dried crystal product was chromatographed on silica gel eluted with 25 % ethyl acetate-hexane. The total percent yield of the product was 15.5 % with a Rf value of 0.893 and melting point of 104.5 °C.

**(2*E*,6*E*)-4-methyl-2,6-bis[(2*E*)-3-phenylprop-2-en-1-ylidene]cyclohexan-1-one**: Using *(E)*-3-phenylprop-2-enal (3.15 mL)**,** also known as*trans*-cinnamaldehyde, was stirred at room temperature with 1.52 mL of 4-methylcyclohexanone in a 125 mL Erlenmeyer flask. In a 125 mL Erlenmeyer flask, 2.52 g of NaOH was dissolved in 25.05 mL of deionized water and 20.02 mL of ethanol. This solution was cooled to 20 °C in an ice water bath. Approximately 2 mL of the cinnamaldehyde and 4-methylcyclohexanone solution was added to the NaOH, deionized water, and ethanol solution and stirred at room temperature for about 15 minutes. The other half of the aldehyde/ketone solution was added to the flask and stirred overnight at room temperature. A clay-like precipitate formed, similar to the synthesis of (1*E*,3*E*,6*E*,8*E*)-2,8-dimethyl-1,9-diphenylnona-1,3,6,8-tetraen-5-one, that was suctioned filtered using a Buchner funnel. Once it was filtered, the precipitate was transferred to a 300 mL beaker and was broken up in approximately 150 mL of deionized water. The crude product was suction filtered and placed in a 500 mL Erlenmeyer flask. It was recrystallized using about 200 mL of ethanol. The resulting crystals were suctioned filtered and washed with cold ethanol. The recrystallized product was chromatographed on silica gel and was eluted with 25 % ethyl acetate-hexane. The total percent yield of the product was 10.5 % with Rf values of 0.65 and 0.78. The experimental melting point was determined to be 153.1 °C.

**(2*E*,5*E*)-2,5-bis[(2*E*)-3-phenylprop-2-en-1-ylidene]cyclopentan-1-one**: *(E)*-3-phenylprop-2-enal (3.16 mL), cinnamaldehyde, was mixed with 1.11 mL of cyclopentanone in a 125 mL Erlenmeyer flask at room temperature. In a separate 125 mL Erlenmeyer flask, 2.55 g of sodium hydroxide was dissolved in 25.05 mL of deionized water and 20.03 mL of ethanol. The solution was mixed at room temperature until the NaOH pellets were completely dissolved and placed into an ice water bath until it cooled to 20 °C. Approximately 2 mL of the cinnamaldehyde and cyclopentanone solution was added to the flask containing the NaOH, deionized water, and ethanol solution. After stirring the solution for 15 minutes, the other half of the cinnamaldehyde and cyclopentanone solution was added to the flask and stirred for 30 minutes at room temperature. The precipitate was suction filtered using a Buchner funnel and transferred in a 300 mL beaker. The precipitate was dissolved with about 150 mL of deionized water, washed with cold ethanol, and suction filtered. The crude product was placed into a 500 mL Erlenmeyer flask and mixed with about 350 mL of ethanol. The filtrate was left to sit overnight and the crystals that formed were suctioned filtered and washed with cold ethanol. The crystal was left to dry overnight. The recrystallized product was chromatographed on silica gel and was eluted with 25 % ethyl acetate-hexane. The total percent yield of the product was 7.99 % with a Rf value of 0.67. The experimental melting point was determined to be 226.9 °C.

**[Compound 1]**

**(1*E*,3*E*,6*E*,8*E*)-1,9-diphenylnona-1,3,6,8-tetraen-5-one**

Molecular Formula: C21H18O

Molecular Weight: 286.37 g/mol

Experimental MP: 142.7 °C

Theoretical MP: 144.0-145.0 °C

1. NMR
   - 13C
   - Stacked NMR of 13C, DEPT 90, and DEPT 135
2. ATR-FTIR
3. UV Vis

13C NMR:


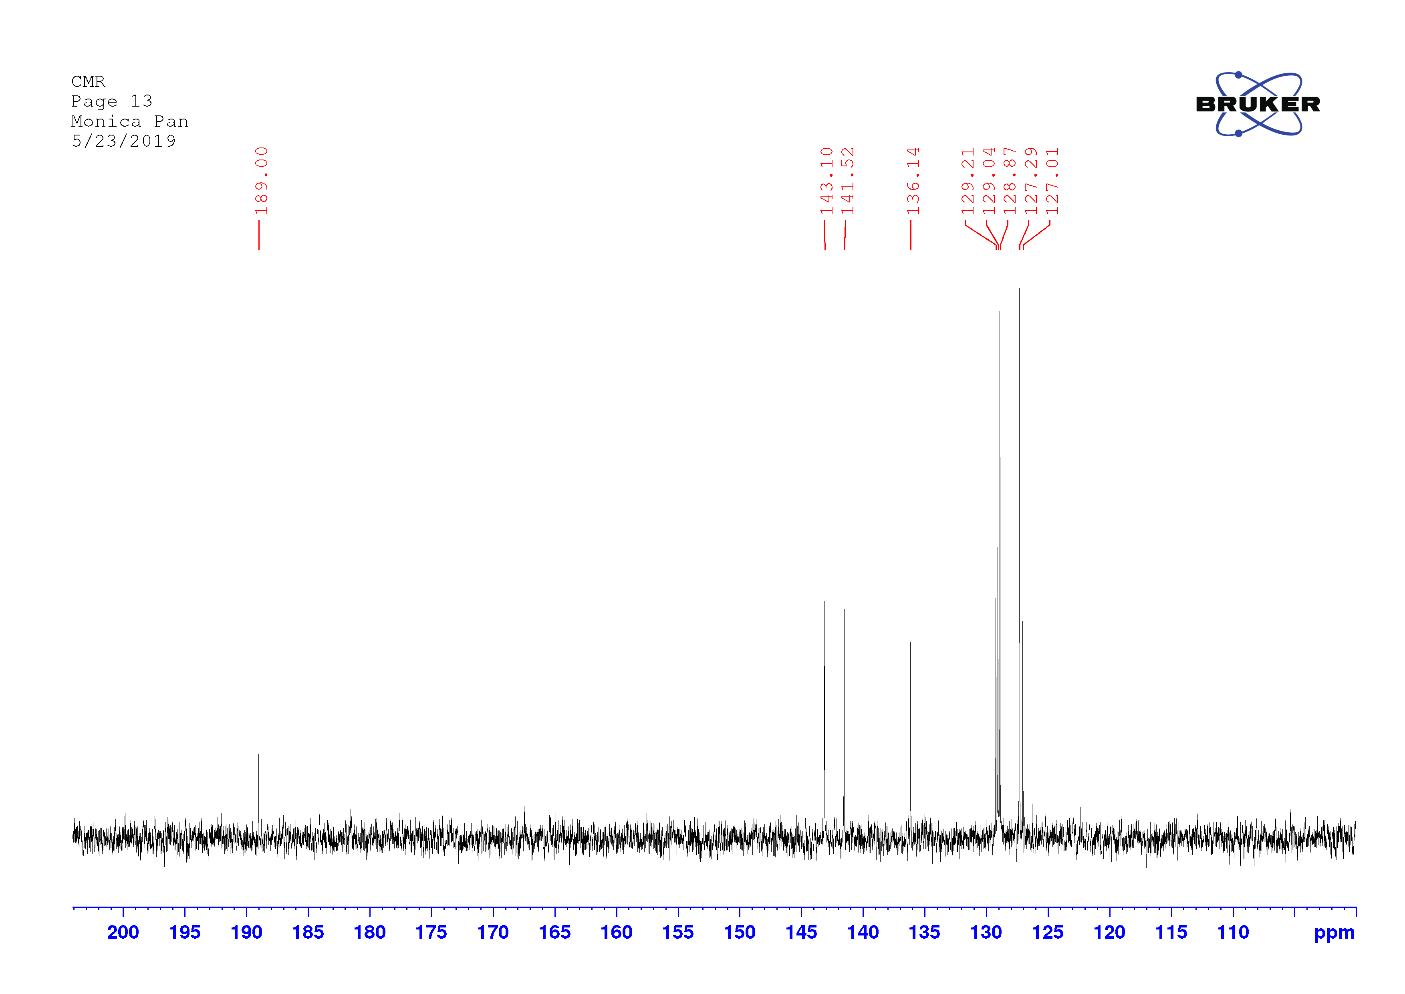


1

2

3

6

7

8

9

5

4

***Figure 1a****. 13CNMR spectrum of (1E,3E,6E,8E)-1,9-diphenylnona-1,3,6,8-tetraen-5-one dissolved in chloroform-d.*

***Table 1a****. The chemical shifts (δC) for carbons present in*

*(1E,3E,6E,8E)-1,9-diphenylnona-1,3,6,8-tetraen-5-one, assigned using reference tables and ChemDraw estimations.*

| **Carbon** | **Mode** | **Chemical Shift**  **(δC )** |
| --- | --- | --- |
| C1 | C=O | 189.00 |
| C2 | C=C | 127.01 |
| C3 | C=C | 143.10 |
| C4 | C=C | 127.29 |
| C5 | C=C | 141.52 |
| C6 | C=C | 136.14 |
| C7 | C=C | 129.04 |
| C8 | C=C | 129.20 |
| C9 | C=C | 128.87 |

Stacked NMR:

*
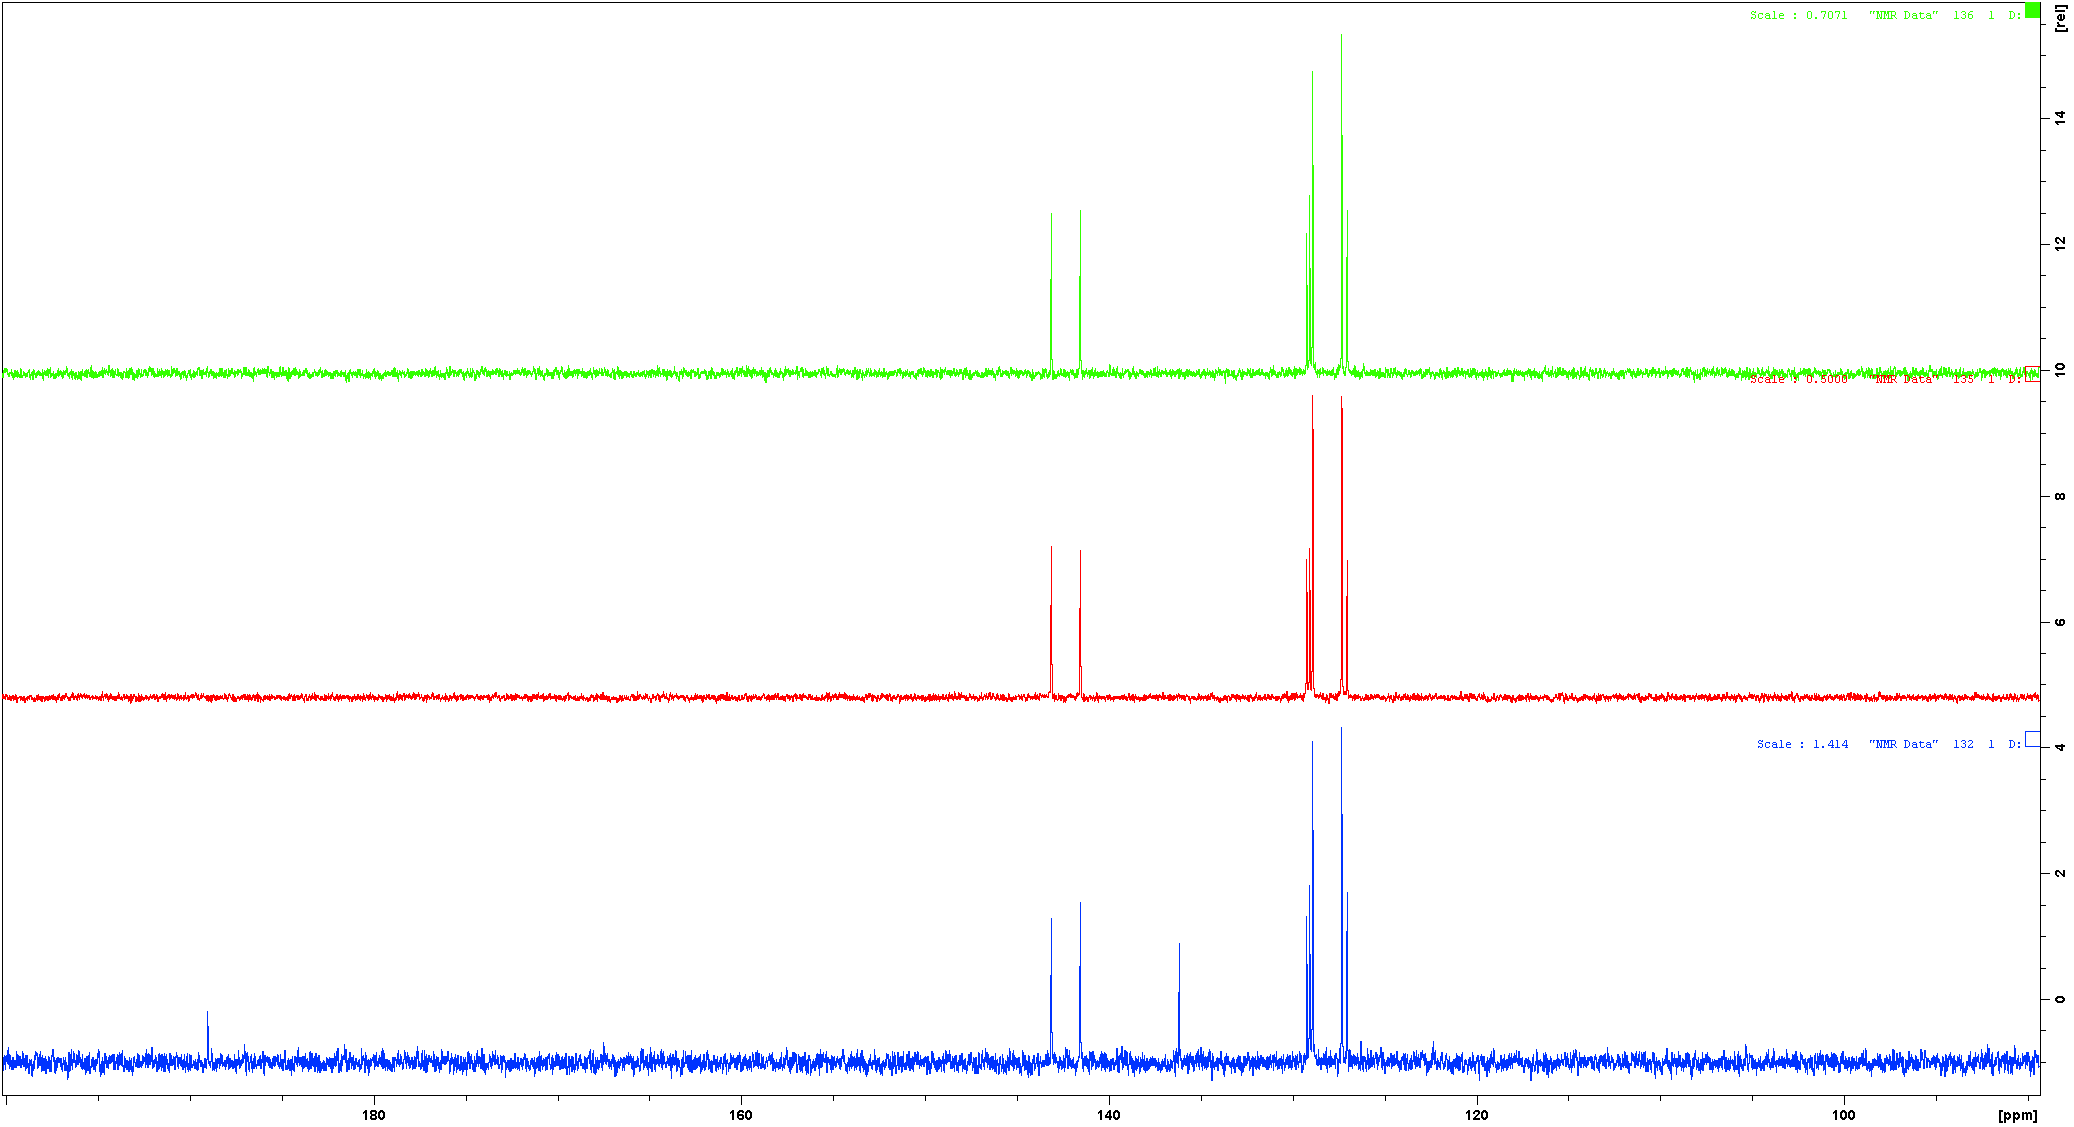
*

A

B

C

3

9

4

8

7

5

2

4

9

2

3

5

8

7

9

7

8

6

5

4

3

2

1

2

***Figure 2a****. Stacked NMR spectra of (1E,3E,6E,8E)-1,9-diphenylnona-1,3,6,8-tetraen-5-one dissolved in deuterated chloroform. Spectrum A (blue) represents 13C NMR, spectrum B (red) represents DEPT 90 NMR, and spectrum C (green) represents DEPT 135 NMR, where each peak was assigned using reference tables and ChemDraw estimations.*


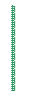
IR:

1617

***Figure 3a****. ATR-FTIR spectrum of (1E,3E,6E,8E)-1,9-diphenylnona-1,3,6,8-tetraen-5-one.*

***Table 2a****. Wavenumber (cm-1) and the corresponding vibration mode for (1E,3E,6E,8E)-1,9-diphenylnona-1,3,6,8-tetraen-5-one ATR-FTIR spectrum.*

| **Wavenumber (cm-1)** | **Vibrational Mode** |
| --- | --- |
| 3027 | C-H (alkene) |
| 1617 | C=O |
| 1575 | C=C |
| 997 | C=C (bending) |
| 689 | Benzene derivative |

UV Vis:

***Figure 4a****. UV absorbance spectrum of in 95% ethanol,*

**[Compound 2]**

**(1*E*,3*E*,6*E*,8*E*)-2,8-dimethyl-1,9-diphenylnona-1,3,6,8-tetraen-5-one**

Molecular Formula: C23H22O

Molecular Weight: 314.43 g/mol

Experimental MP: 123.8 °C

Theoretical MP: ---

1. NMR
   - 13C
   - Stacked NMR of 13C, DEPT 90, and DEPT 135
2. ATR-FTIR
3. UV Vis

13C NMR:


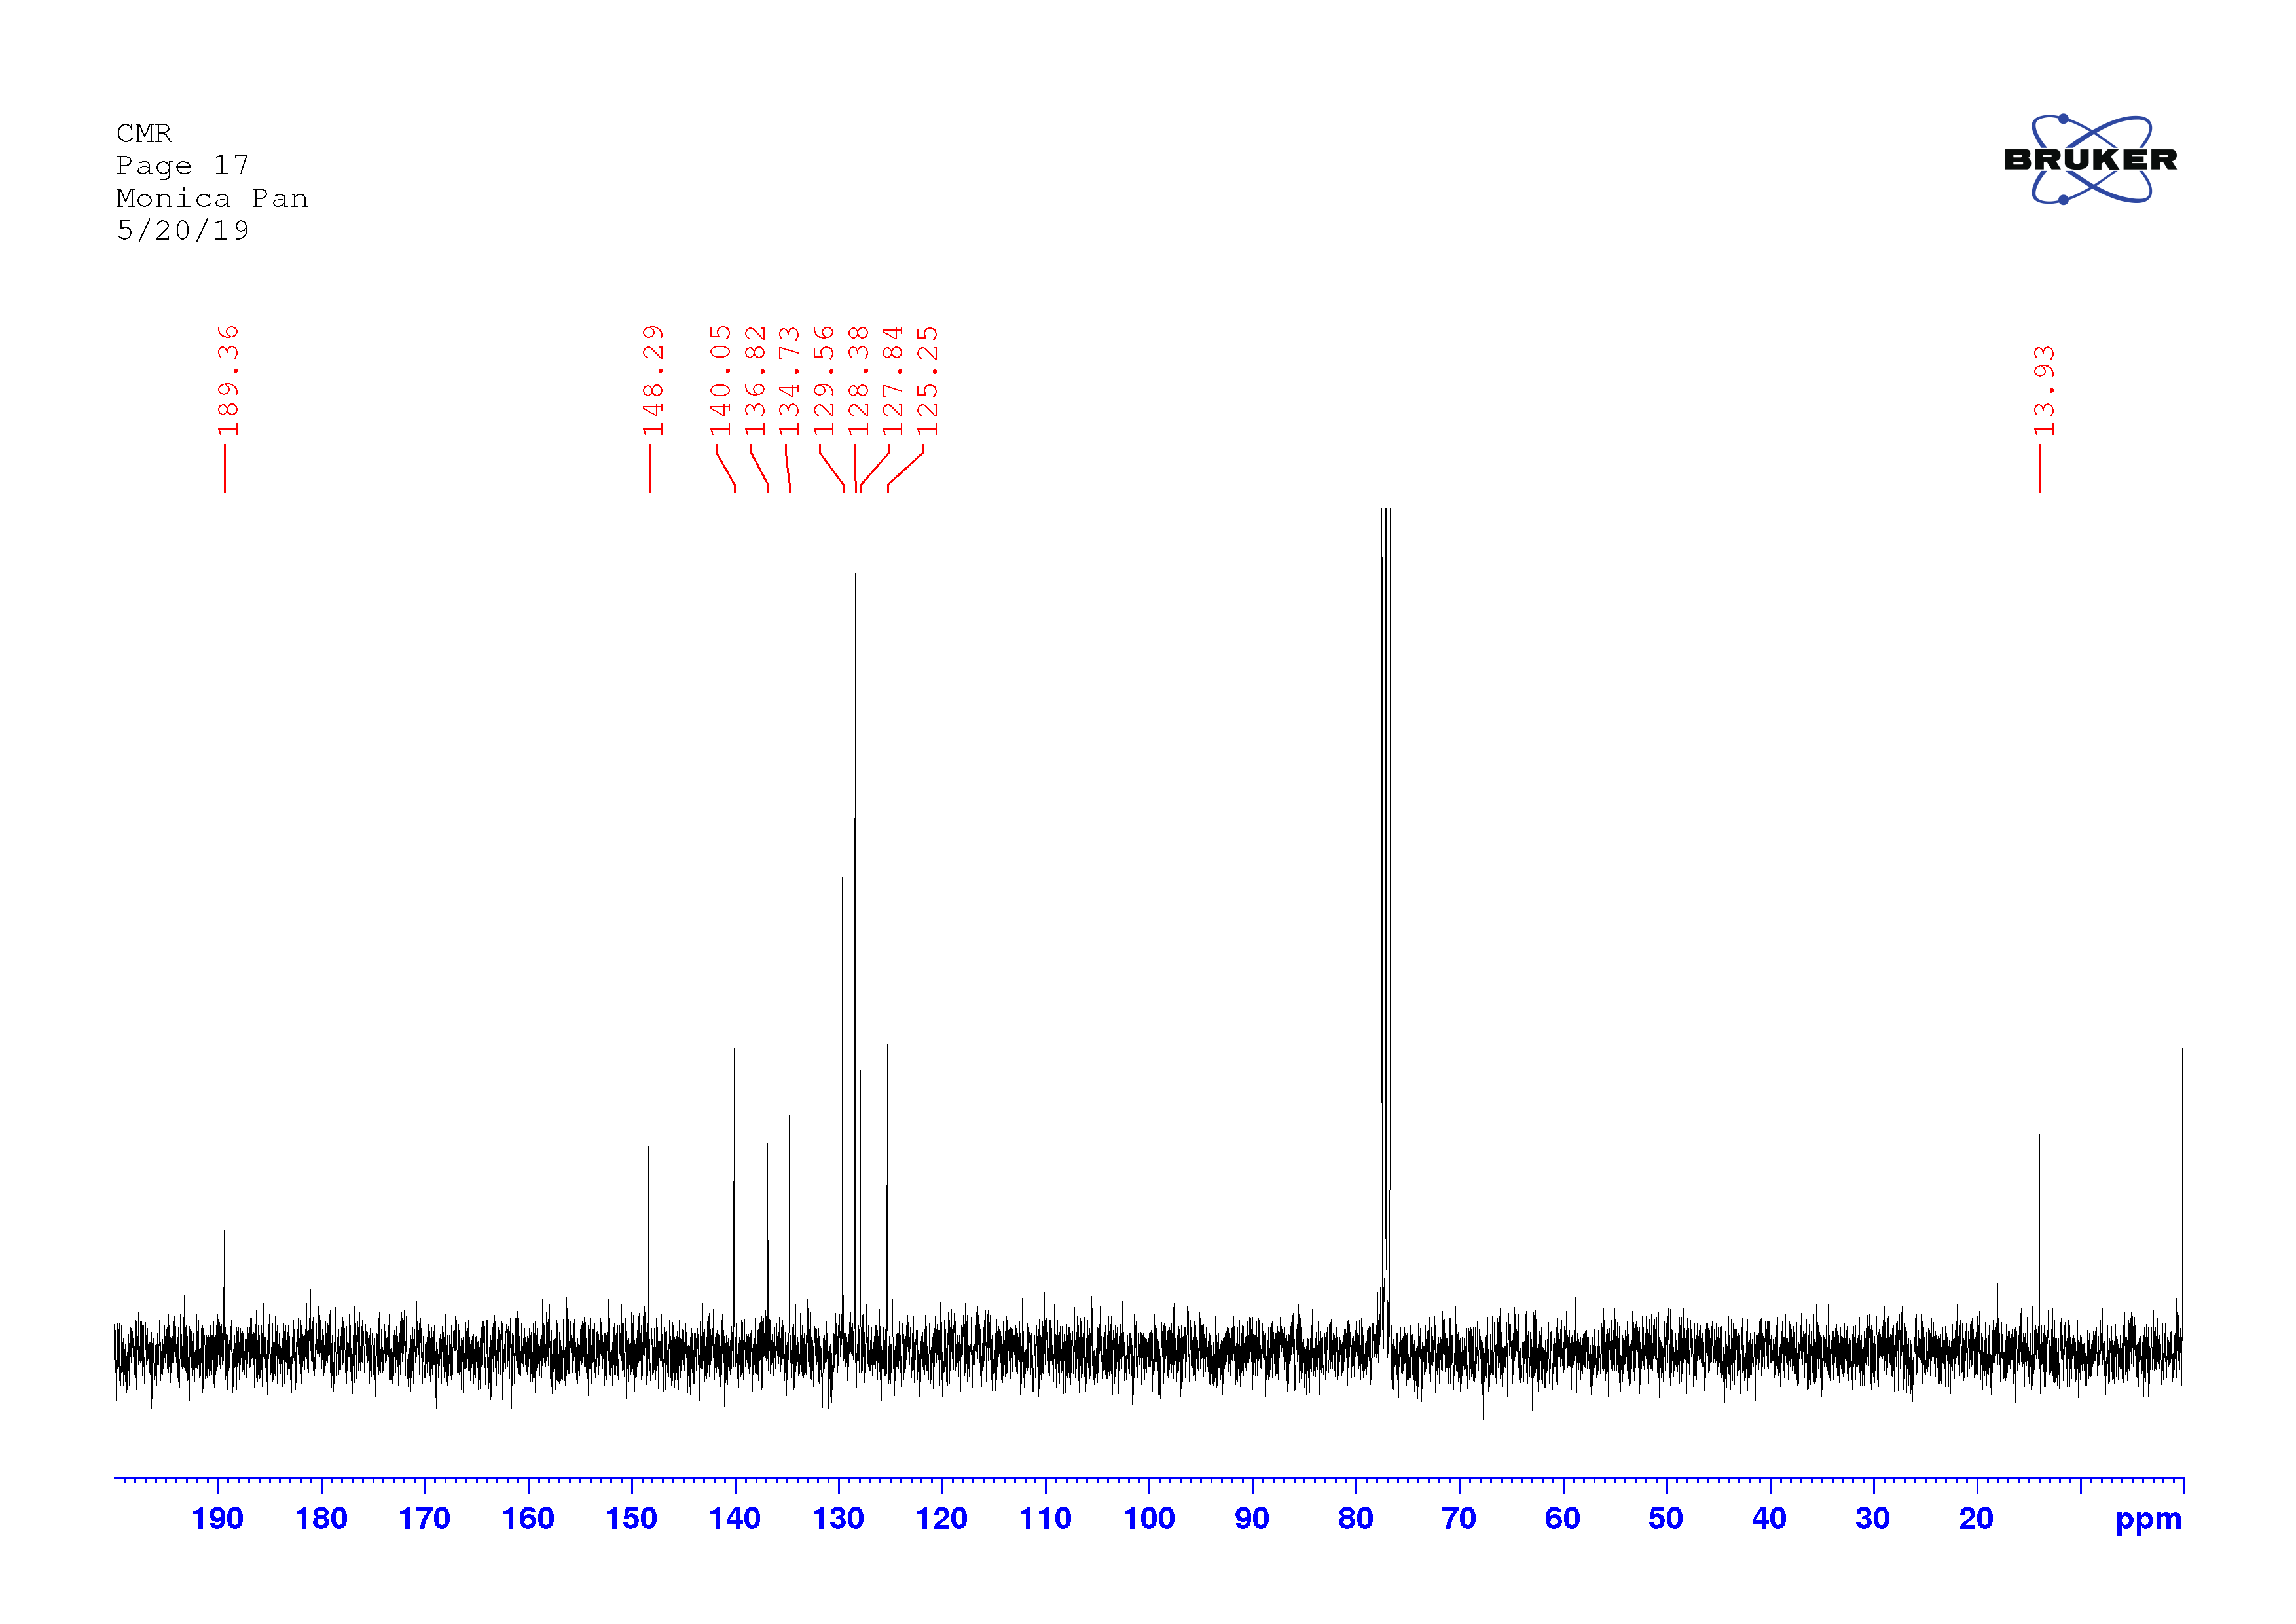


10

1

3

5

6

4

7

8

9

2

***Figure 5a****. 13CNMR spectrum of (1E,3E,6E,8E)-2,8-dimethyl-1,9-diphenylnona-1,3,6,8-tetraen-5-one**dissolved in chloroform-d.*

***Table 3a****. The chemical shifts (δC) for carbons present in*

| **Carbon** | **Mode** | **Chemical Shift (δC)** |
| --- | --- | --- |
| C1 | C=O | 189.36 |
| C2 | C=C | 125.25 |
| C3 | C=C | 148.29 |
| C4 | C=C | 134.73 |
| C5 | C=C | 140.05 |
| C6 | C=C | 136.82 |
| C7 | C=C | 128.38 |
| C8 | C=C | 129.56 |
| C9 | C=C | 127.84 |

*(1E,3E,6E,8E)-2,8-dimethyl-1,9-diphenylnona-1,3,6,8-tetraen-5-one, assigned using reference tables and ChemDraw estimations.*

*.*

Stacked NMR:


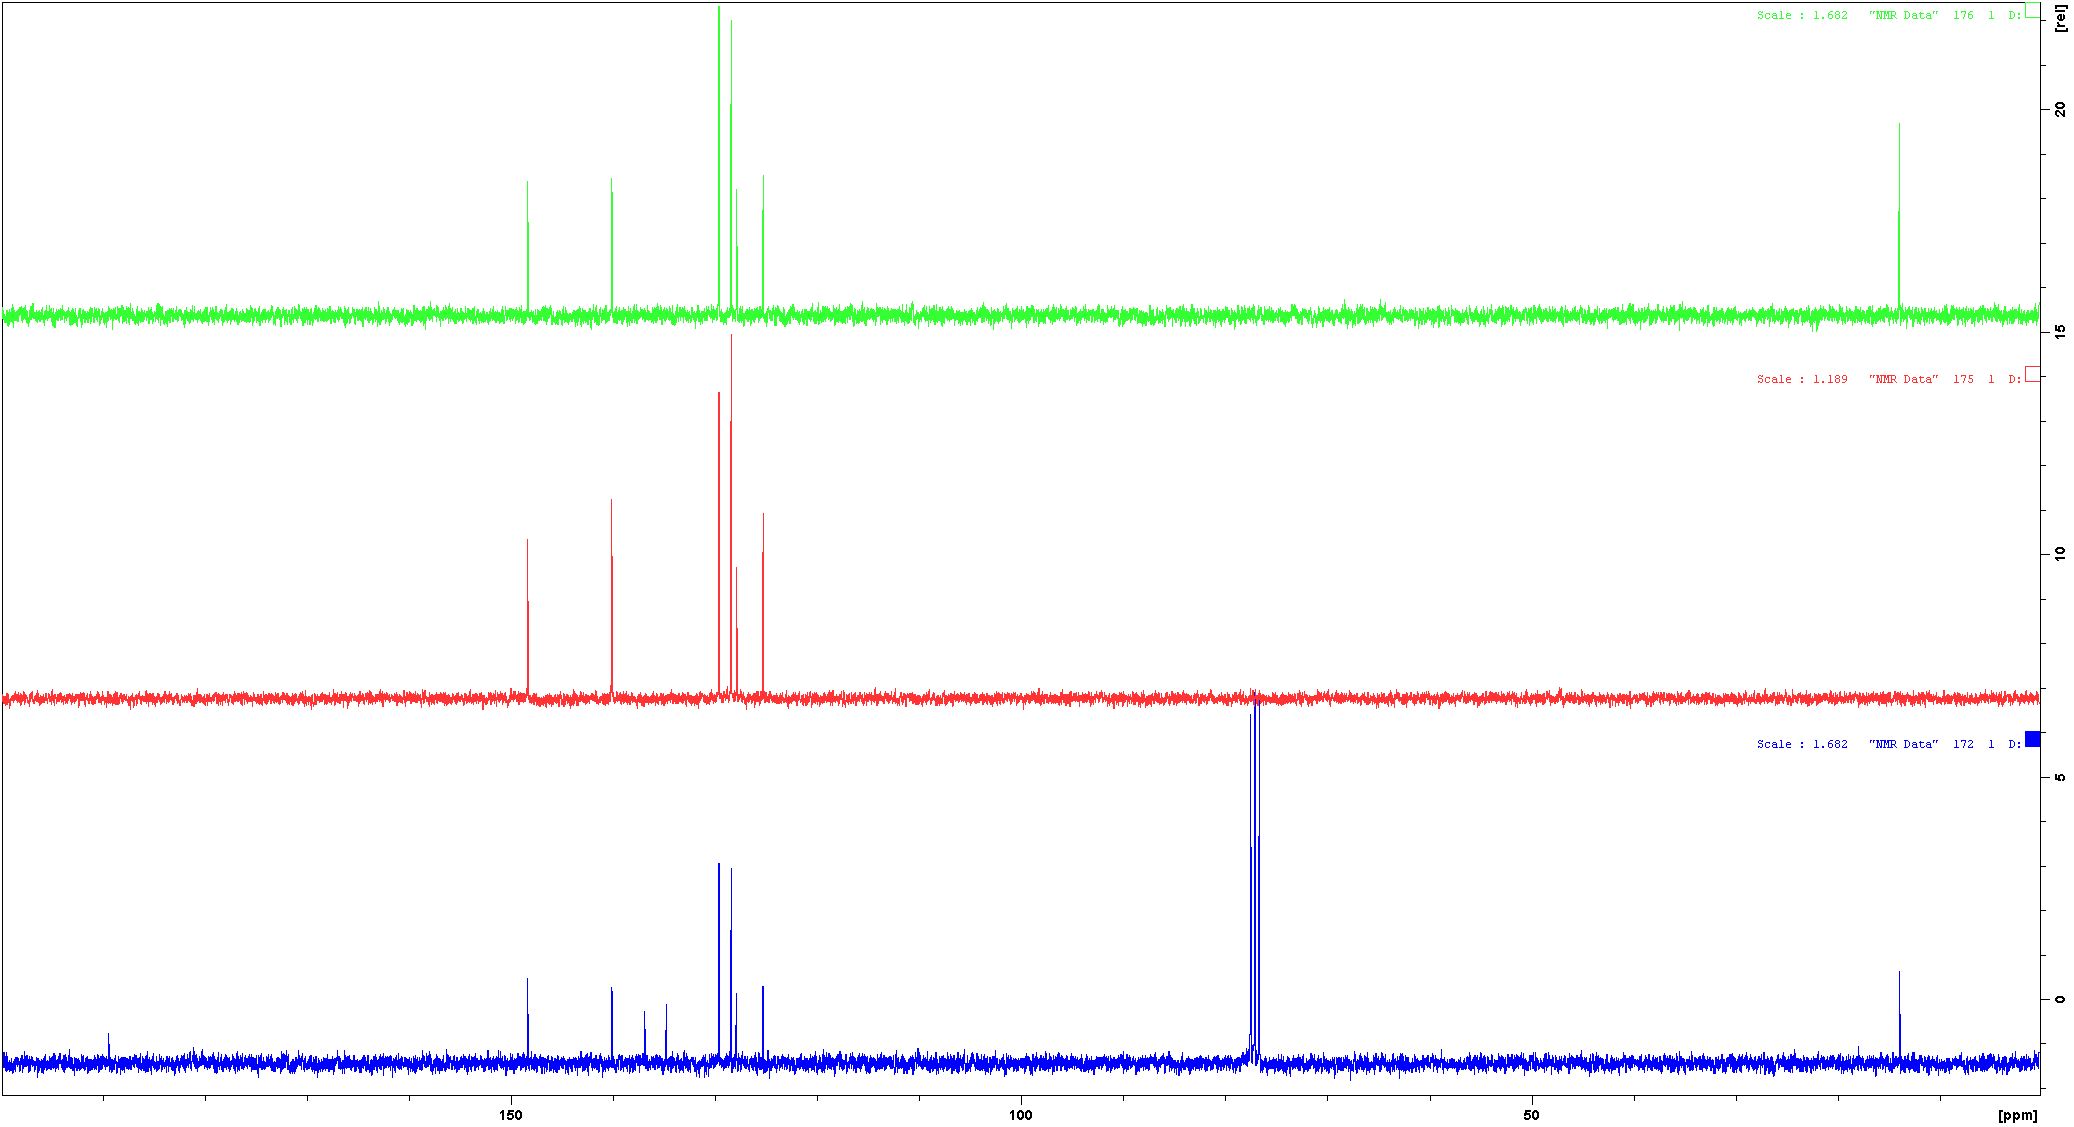


2

9

8

7

5

3

3

8

7

9

2

10

7

8

1

C

B

A

5

10

2

9

4

6

5

3

***Figure 6a***. *Stacked NMR spectra of (1E,3E,6E,8E)-2,8-dimethyl-1,9-diphenylnona-1,3,6,8-tetraen-5-one dissolved in deuterated chloroform. Spectrum A (blue) represents 13C NMR, spectrum B (red) represents DEPT 90 NMR, and spectrum C (green) represents DEPT 135 NMR, where each peak was assigned using reference tables and ChemDraw estimations.*


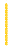
IR:

1576

***Figure 7a****. ATR-FTIR spectrum of (1E,3E,6E,8E)-2,8-dimethyl-1,9-diphenylnona-1,3,6,8-tetraen-5-one.*

| **Wavenumber (cm-1)** | **Vibrational Mode** |
| --- | --- |
| 3024 | C-H (alkene) |
| 1606 | C=O |
| 1576 | C=C |
| 977 | C=C (bending) |
| 695 | Benzene Derivative |

***Table 4a****. Wavenumber (cm-1) and the corresponding vibration mode for of (1E,3E,6E,8E)-2,8-dimethyl-1,9-diphenylnona-1,3,6,8-tetraen-5-one ATR-FTIR spectrum.*

UV Vis:

***Figure 8a****. UV absorbance spectrum of in 95% ethanol.*

*.*

**[Compound 3]**

**(2*E*,6*E*)-2,6-bis[(2*E*)-3-phenylprop-2-en-1-ylidene]cyclohexan-1-one**

Molecular Formula: C24H22O

Molecular Weight: 326.44 g/mol

Experimental MP: 104.5 °C

Theoretical MP: ---

1. NMR
   - 13C
   - Stacked NMR of 13C, DEPT 90, and DEPT 135
2. ATR-FTIR
3. UV Vis


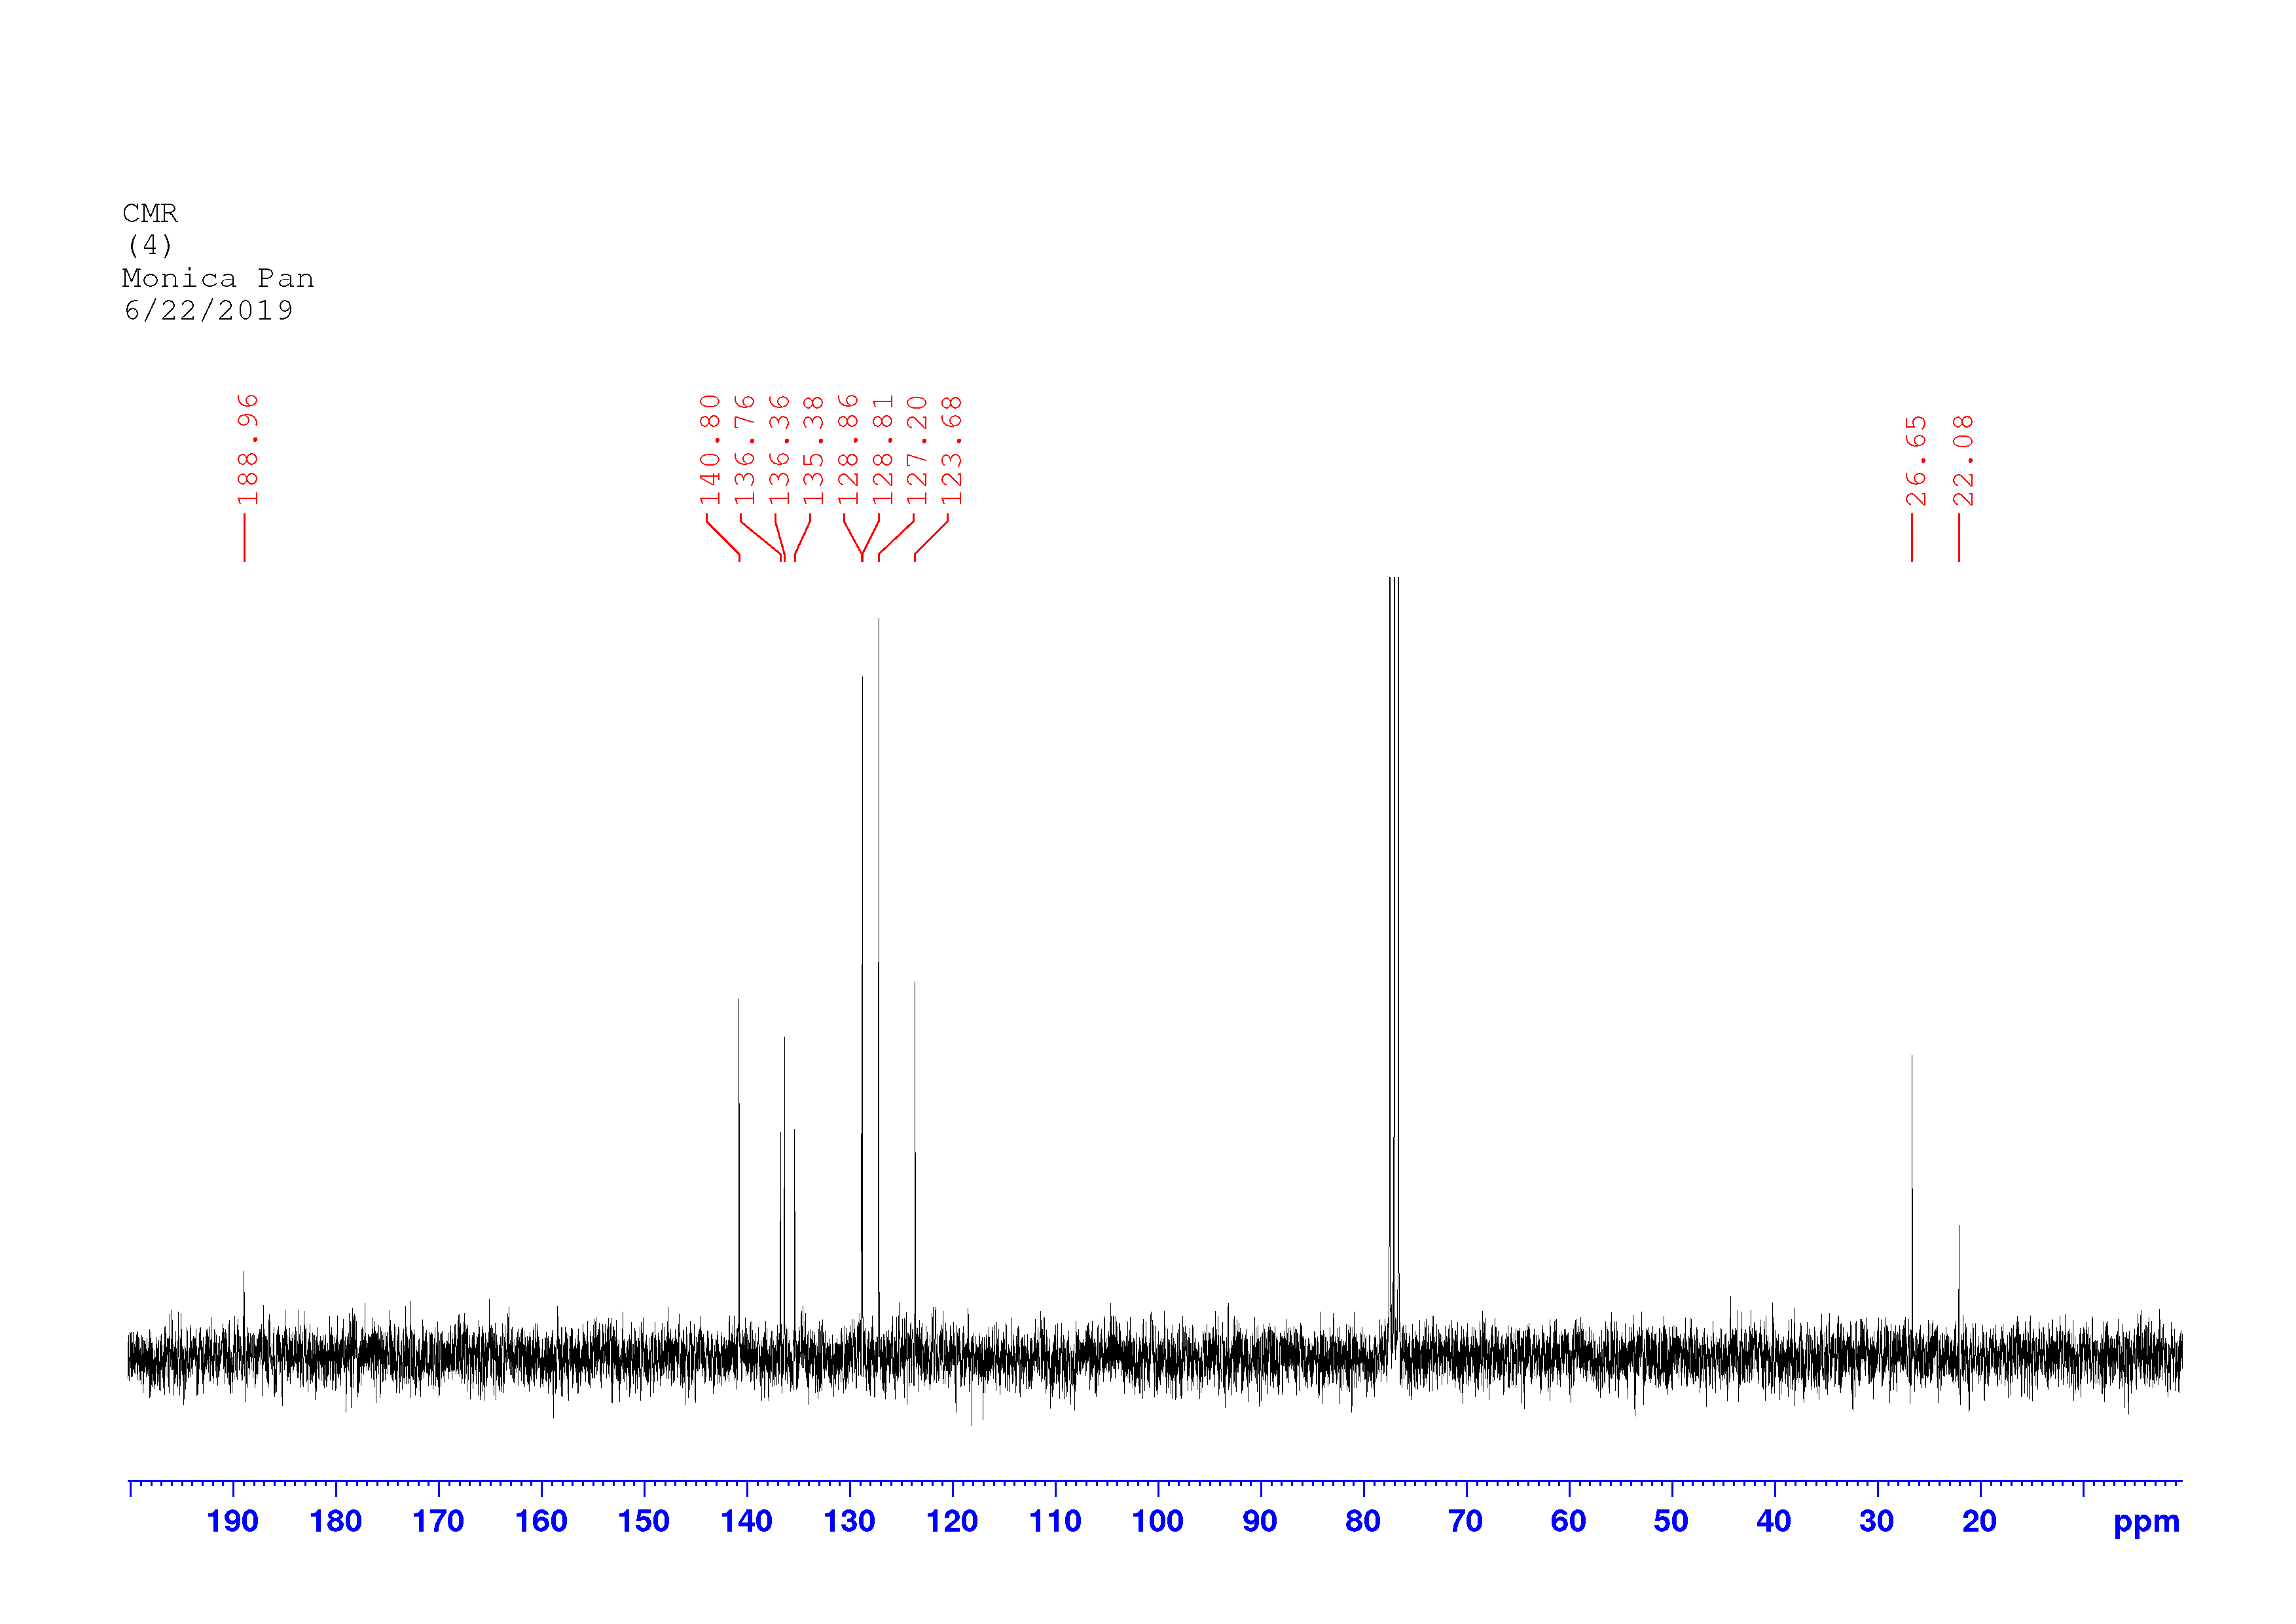
13C NMR:

11

10

3

5

6

8

7

9

4

2

1

***Figure 9a****. 13CNMR spectrum of (2E,6E)-2,6-bis[(2E)-3-phenylprop-2-en-1-ylidene]cyclohexan-1-one dissolved in chloroform-d.*

***Table 5a****. The chemical shifts (δC) for carbons present in*

*(2E,6E)-2,6-bis[(2E)-3-phenylprop-2-en-1-ylidene]cyclohexan-1-one, assigned using reference tables and ChemDraw estimations.*

| **Carbon** | **Mode** | **Chemical Shift (δ)** |
| --- | --- | --- |
| C1 | C=O | 189.96 |
| C2 | C=C | 123.68 |
| C3 | C=C | 140.80 |
| C4 | C=C | 127.20 |
| C5 | C=C | 136.76 |
| C6 | C=C | 136.36 |
| C7 | C=C | 128.86 |
| C8 | C=C | 135.38 |
| C9 | C=C | 128.81 |
| C10 | C=C | 26.65 |
| C11 | C=C | 22.08 |

Stacked NMR:

**
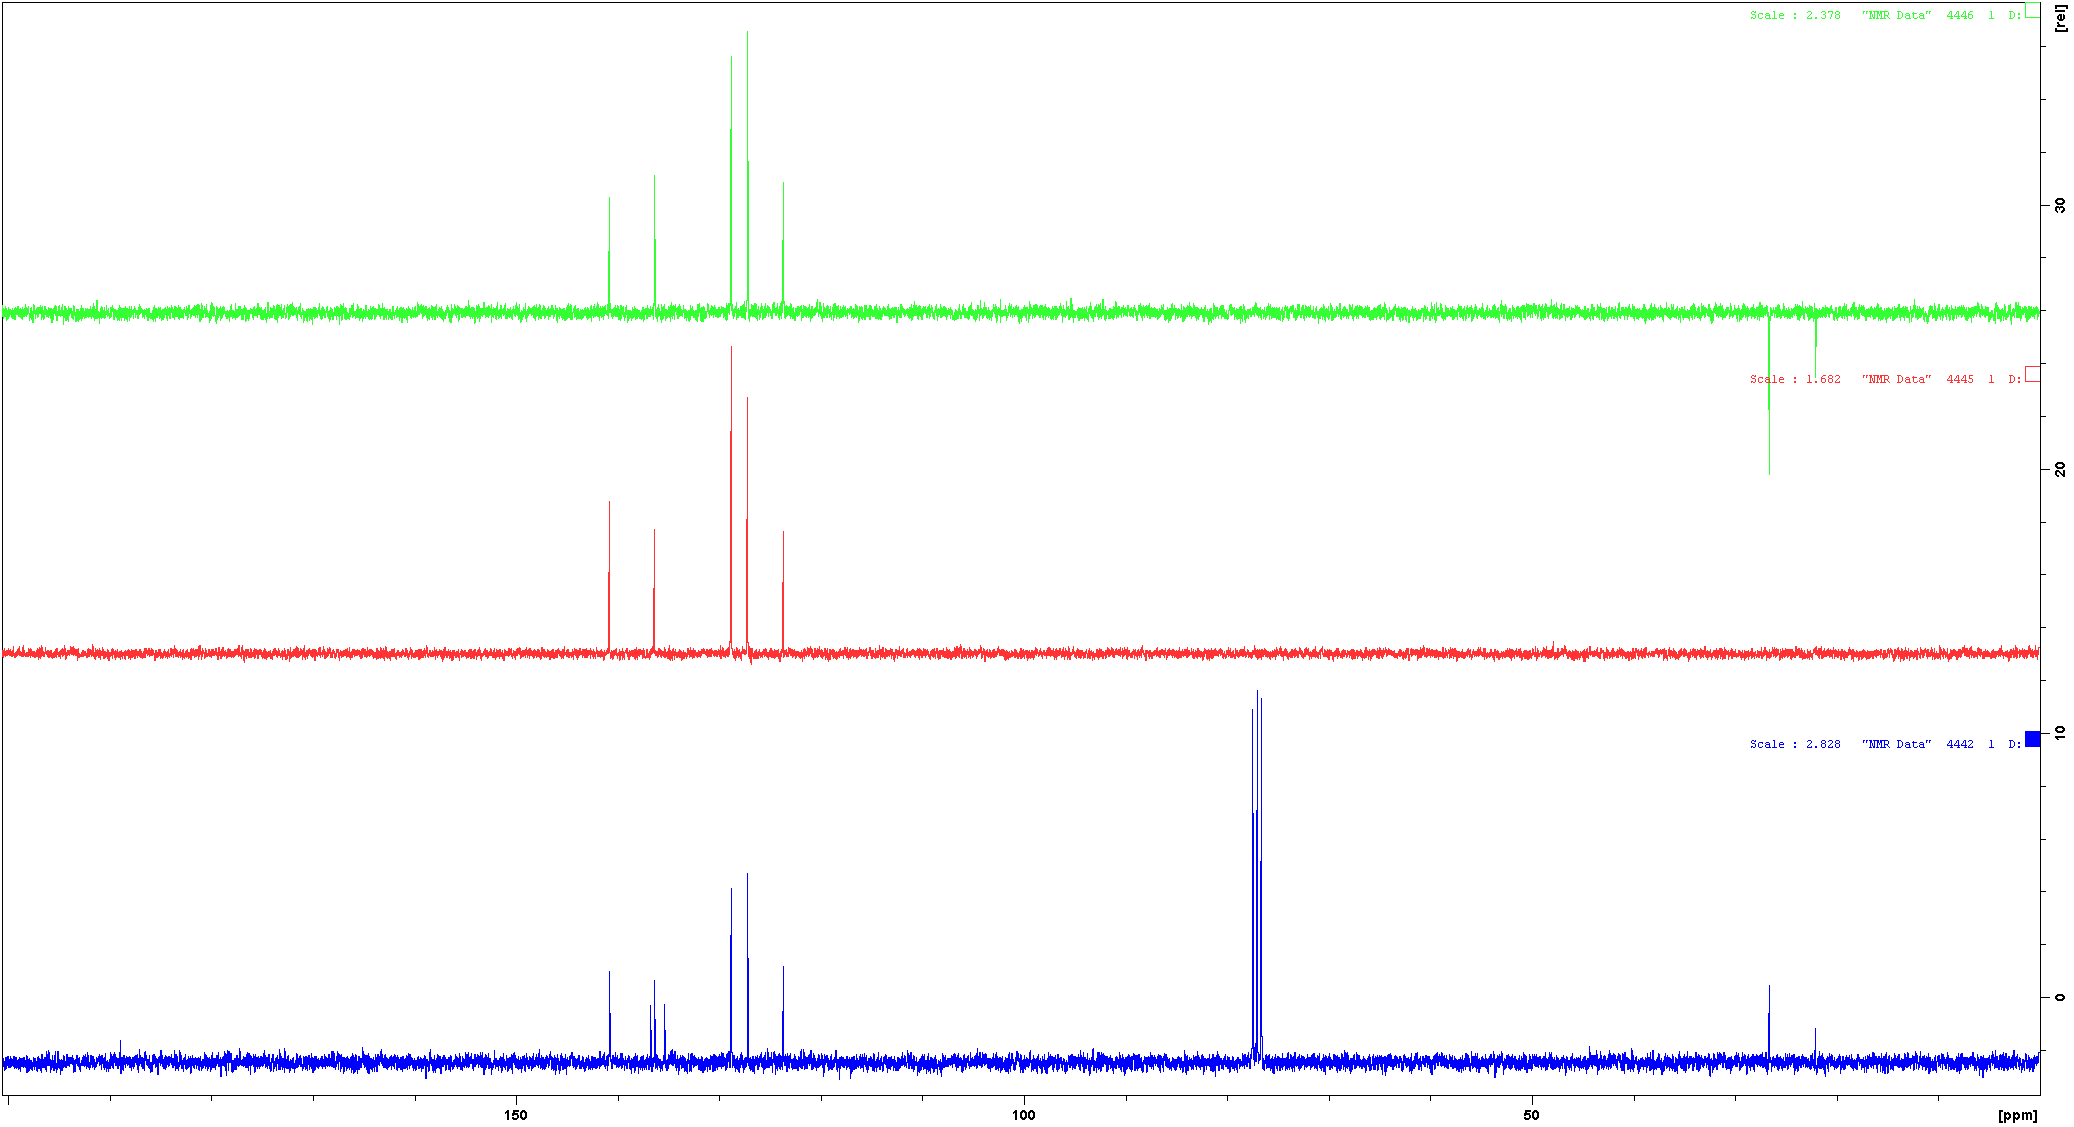
*Figure 10a****. Stacked NMR spectra of (2E,6E)-2,6-bis[(2E)-3-phenylprop-2-en-1-ylidene]cyclohexan-1-one dissolved in deuterated chloroform. Spectrum A (blue) represents 13C NMR, spectrum B (red) represents DEPT 90 NMR, and spectrum C (green) represents DEPT 135 NMR, assigned using reference tables and ChemDraw estimations.*

9

2

6

3

7

11

100

7

9

6

3

2

7

9

8

6

5

11

100

4

3

2

1


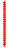
IR:

1610

***Figure 11a****. ATR-FTIR spectrum of (2E,6E)-2,6-bis[(2E)-3-phenylprop-2-en-1-ylidene]cyclohexan-1-one.*

***Table 6a****. Wavenumber (cm-1) and the corresponding vibration mode for (2E,6E)-2,6-bis[(2E)-3-phenylprop-2-en-1-ylidene]cyclohexan-1-one ATR-FTIR spectrum.*

| **Wavenumber (cm-1)** | **Vibrational Mode** |
| --- | --- |
| 3646 | C-H (alkene) |
| 1610 | C=O |
| 1581 | C=C |
| 976 | C=C (bending) |
| 687 | Benzene Derivative |

UV Vis:

***Figure 12a****. UV absorbance spectrum of in 95% ethanol.*

**[Compound 4]**

**(2*E*,6*E*)-4-methyl-2,6-bis[(2*E*)-3-phenylprop-2-en-1-ylidene]cyclohexan-1-one**

Molecular Formula: C25H24O

Molecular Weight: 340.47 g/mol

Experimental MP: 153.1 °C

Theoretical MP: ---

1. NMR
   - 13C
   - Stacked NMR of 13C, DEPT 90, and DEPT 135
2. ATR-FTIR
3. UV Vis

13C NMR:


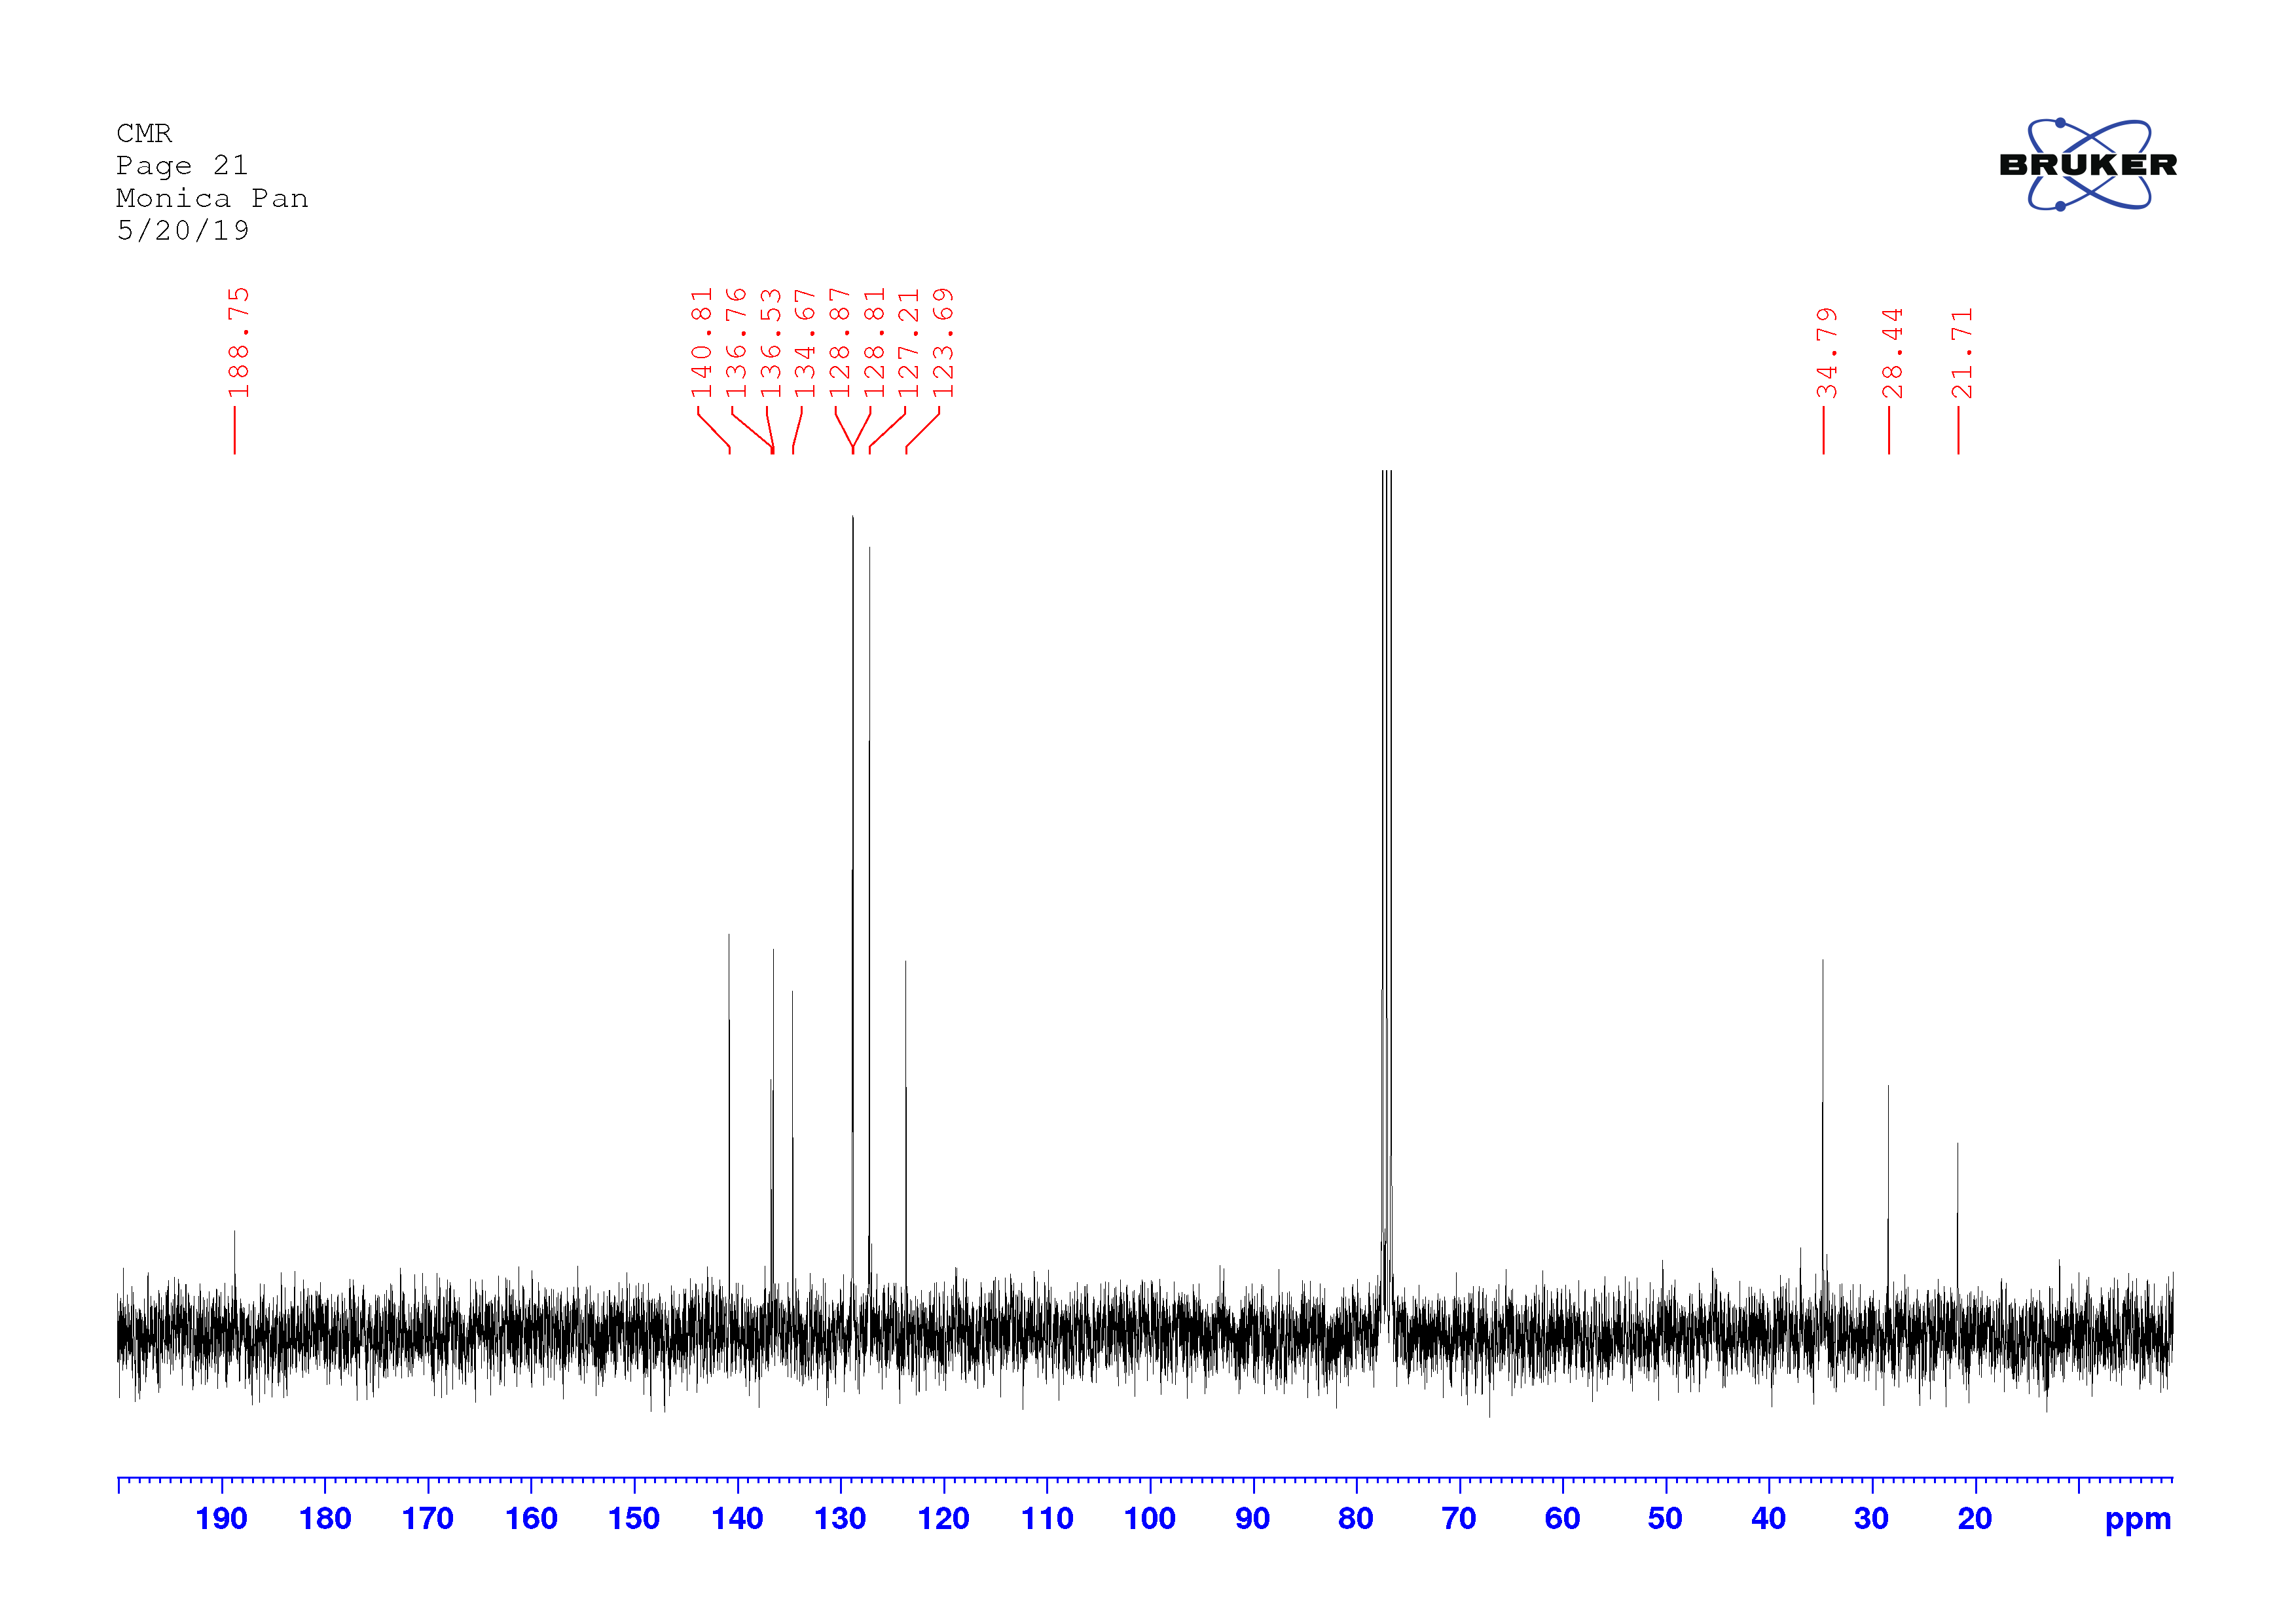


5

1

2

3

4

8

6

9

10

11

12

7

***Figure 13a****. 13CNMR spectrum of (2E,6E)-4-methyl-2,6-bis[(2E)-3-phenylprop-2-en-1-ylidene]cyclohexan-1-one dissolved in chloroform-d.*

***Table 7a****. The chemical shifts (δC) for carbons present in*

| **Carbon** | **Mode** | **Chemical Shift (δC)** |
| --- | --- | --- |
| C1 | C=O | 188.75 |
| C2 | C=C | 123.69 |
| C3 | C=C | 140.81 |
| C4 | C=C | 127.21 |
| C5 | C=C | 136.76 |
| C6 | C=C | 136.53 |
| C7 | C=C | 128.87 |
| C8 | C=C | 134.67 |
| C9 | C=C | 128.81 |
| C10 | C-C | 34.76 |
| C11 | C-C | 28.44 |
| C12 | C-C | 21.71 |

*(2E,6E)-4-methyl-2,6-bis[(2E)-3-phenylprop-2-en-1-ylidene]cyclohexan-1-one, assigned using reference tables and ChemDraw estimations.*

Stacked NMR:

5

5

5

4

9

6

8

B

A

C

**
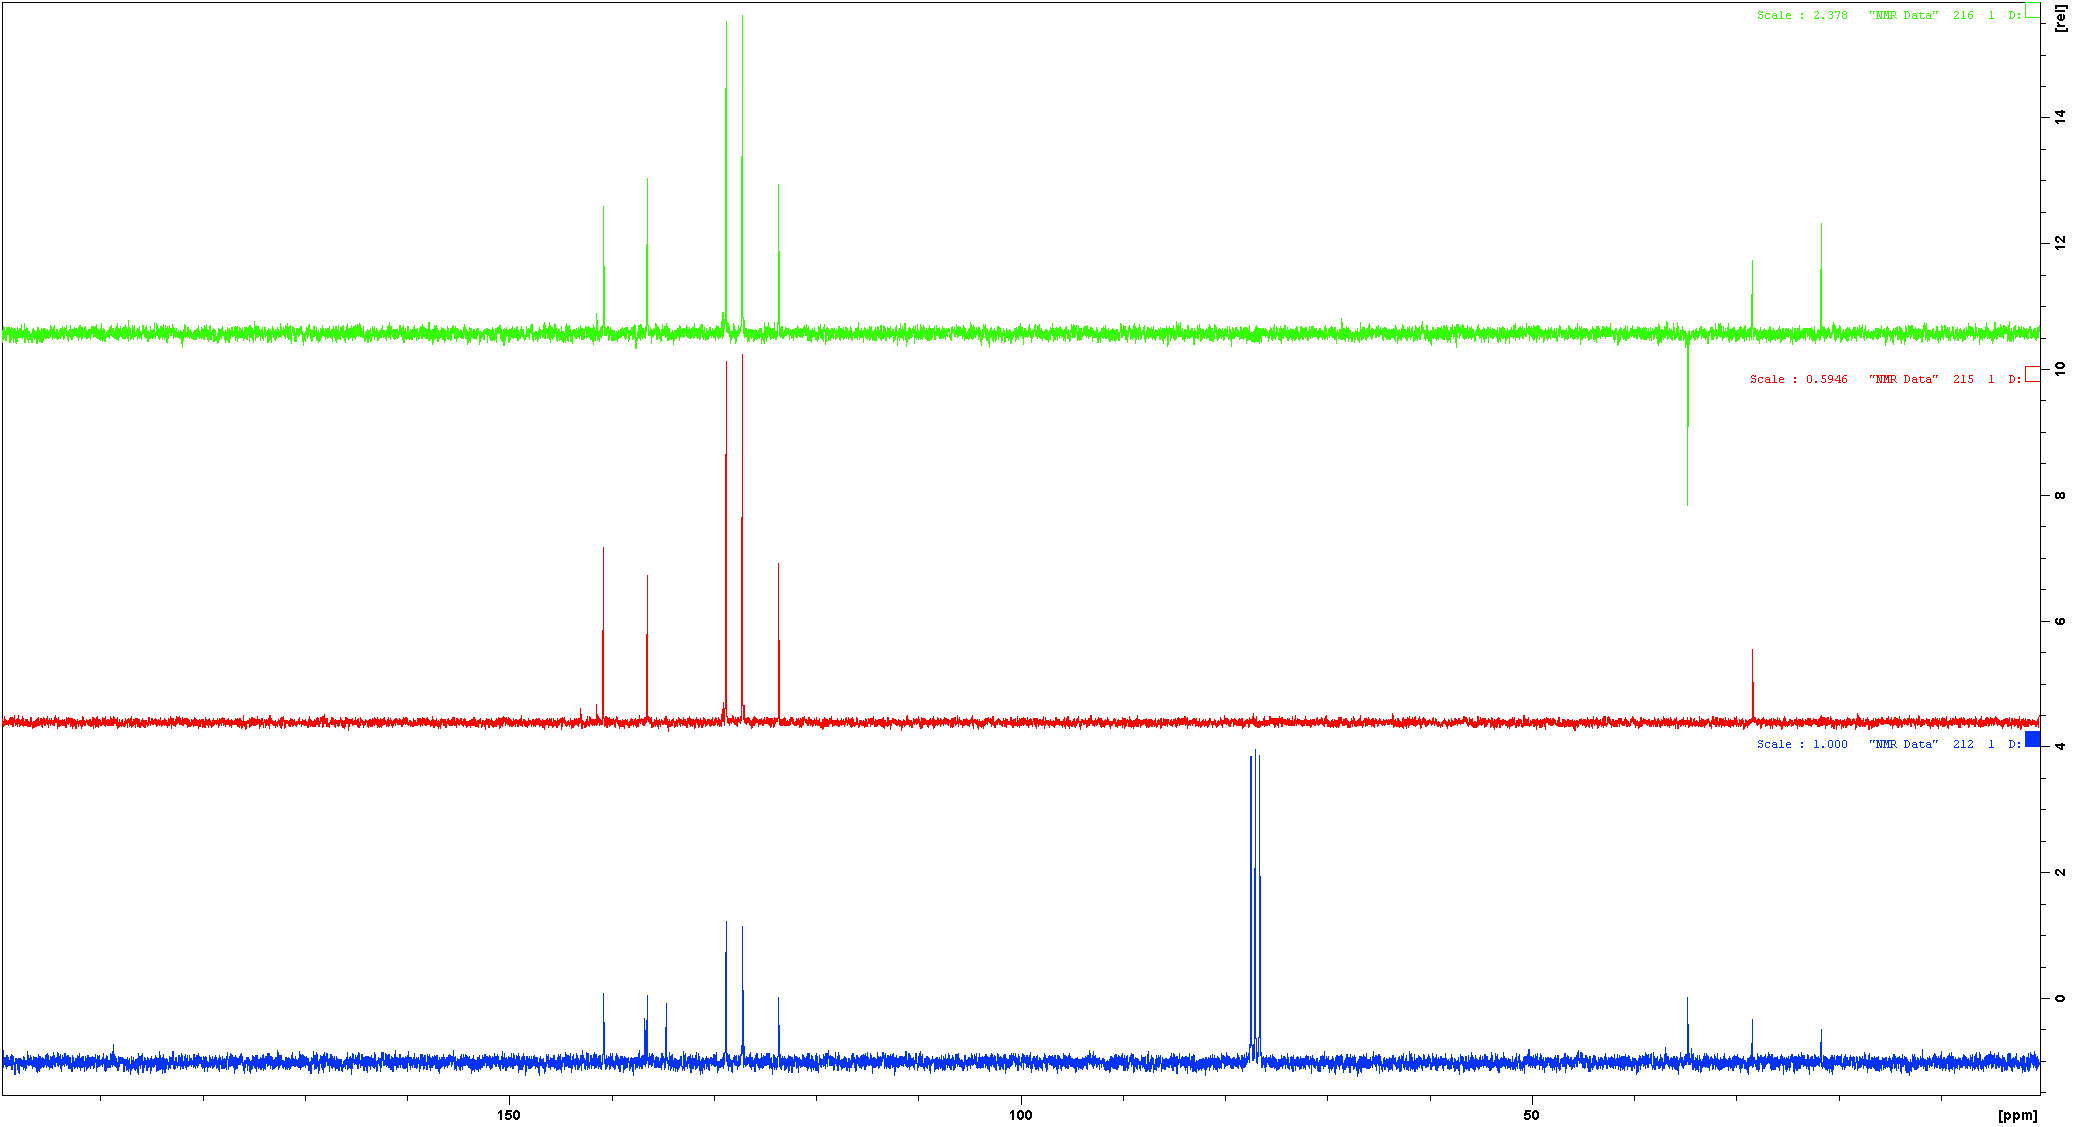
**

***Figure 14a****. Stacked NMR spectra of (2E,6E)-4-methyl-2,6-bis[(2E)-3-phenylprop-2-en-1-ylidene]cyclohexan-1-one dissolved in deuterated chloroform. Spectrum A (blue) represents 13C NMR, spectrum B (red) represents DEPT 90 NMR, and spectrum C (green) represents DEPT 135 NMR, where each peak was assigned using reference tables and ChemDraw estimations.*

1

33

7

2

10

11

12

7

2

11

4

9

8

33

2

7

33

11

12

10

8

4

9


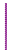
IR:

1608

***Figure 15a****. ATR-FTIR spectrum of (2E,6E)-4-methyl-2,6-bis[(2E)-3-phenylprop-2-en-1-ylidene]cyclohexan-1-one.*

| **Wavenumber (cm-1)** | **Vibrational Mode** |
| --- | --- |
| 3030 | C-H (alkene) |
| 1608 | C=O |
| 1580 | C=C |
| 970 | C=C (bending) |
| 691 | Benzene Derivative |

***Table 8a****. Wavenumber (cm-1) and the corresponding vibration mode for of (2E,6E)-4-methyl-2,6-bis[(2E)-3-phenylprop-2-en-1-ylidene]cyclohexan-1-one ATR-FTIR spectrum.*

UV Vis:

***Figure 16a****. UV absorbance spectrum of in 95% ethanol,*

**[Compound 5]**

**(2*E*,5*E*)-2,5-bis[(2*E*)-3-phenylprop-2-en-1-ylidene]cyclopentan-1-one**

Molecular Formula: C23H20O

Molecular Weight: 312.41 g/mol

Experimental MP: 226.9 °C

Theoretical MP: ---

1. NMR
   - 13C
   - Stacked NMR of 13C, DEPT 90, and DEPT 135
2. ATR-FTIR
3. UV Vis


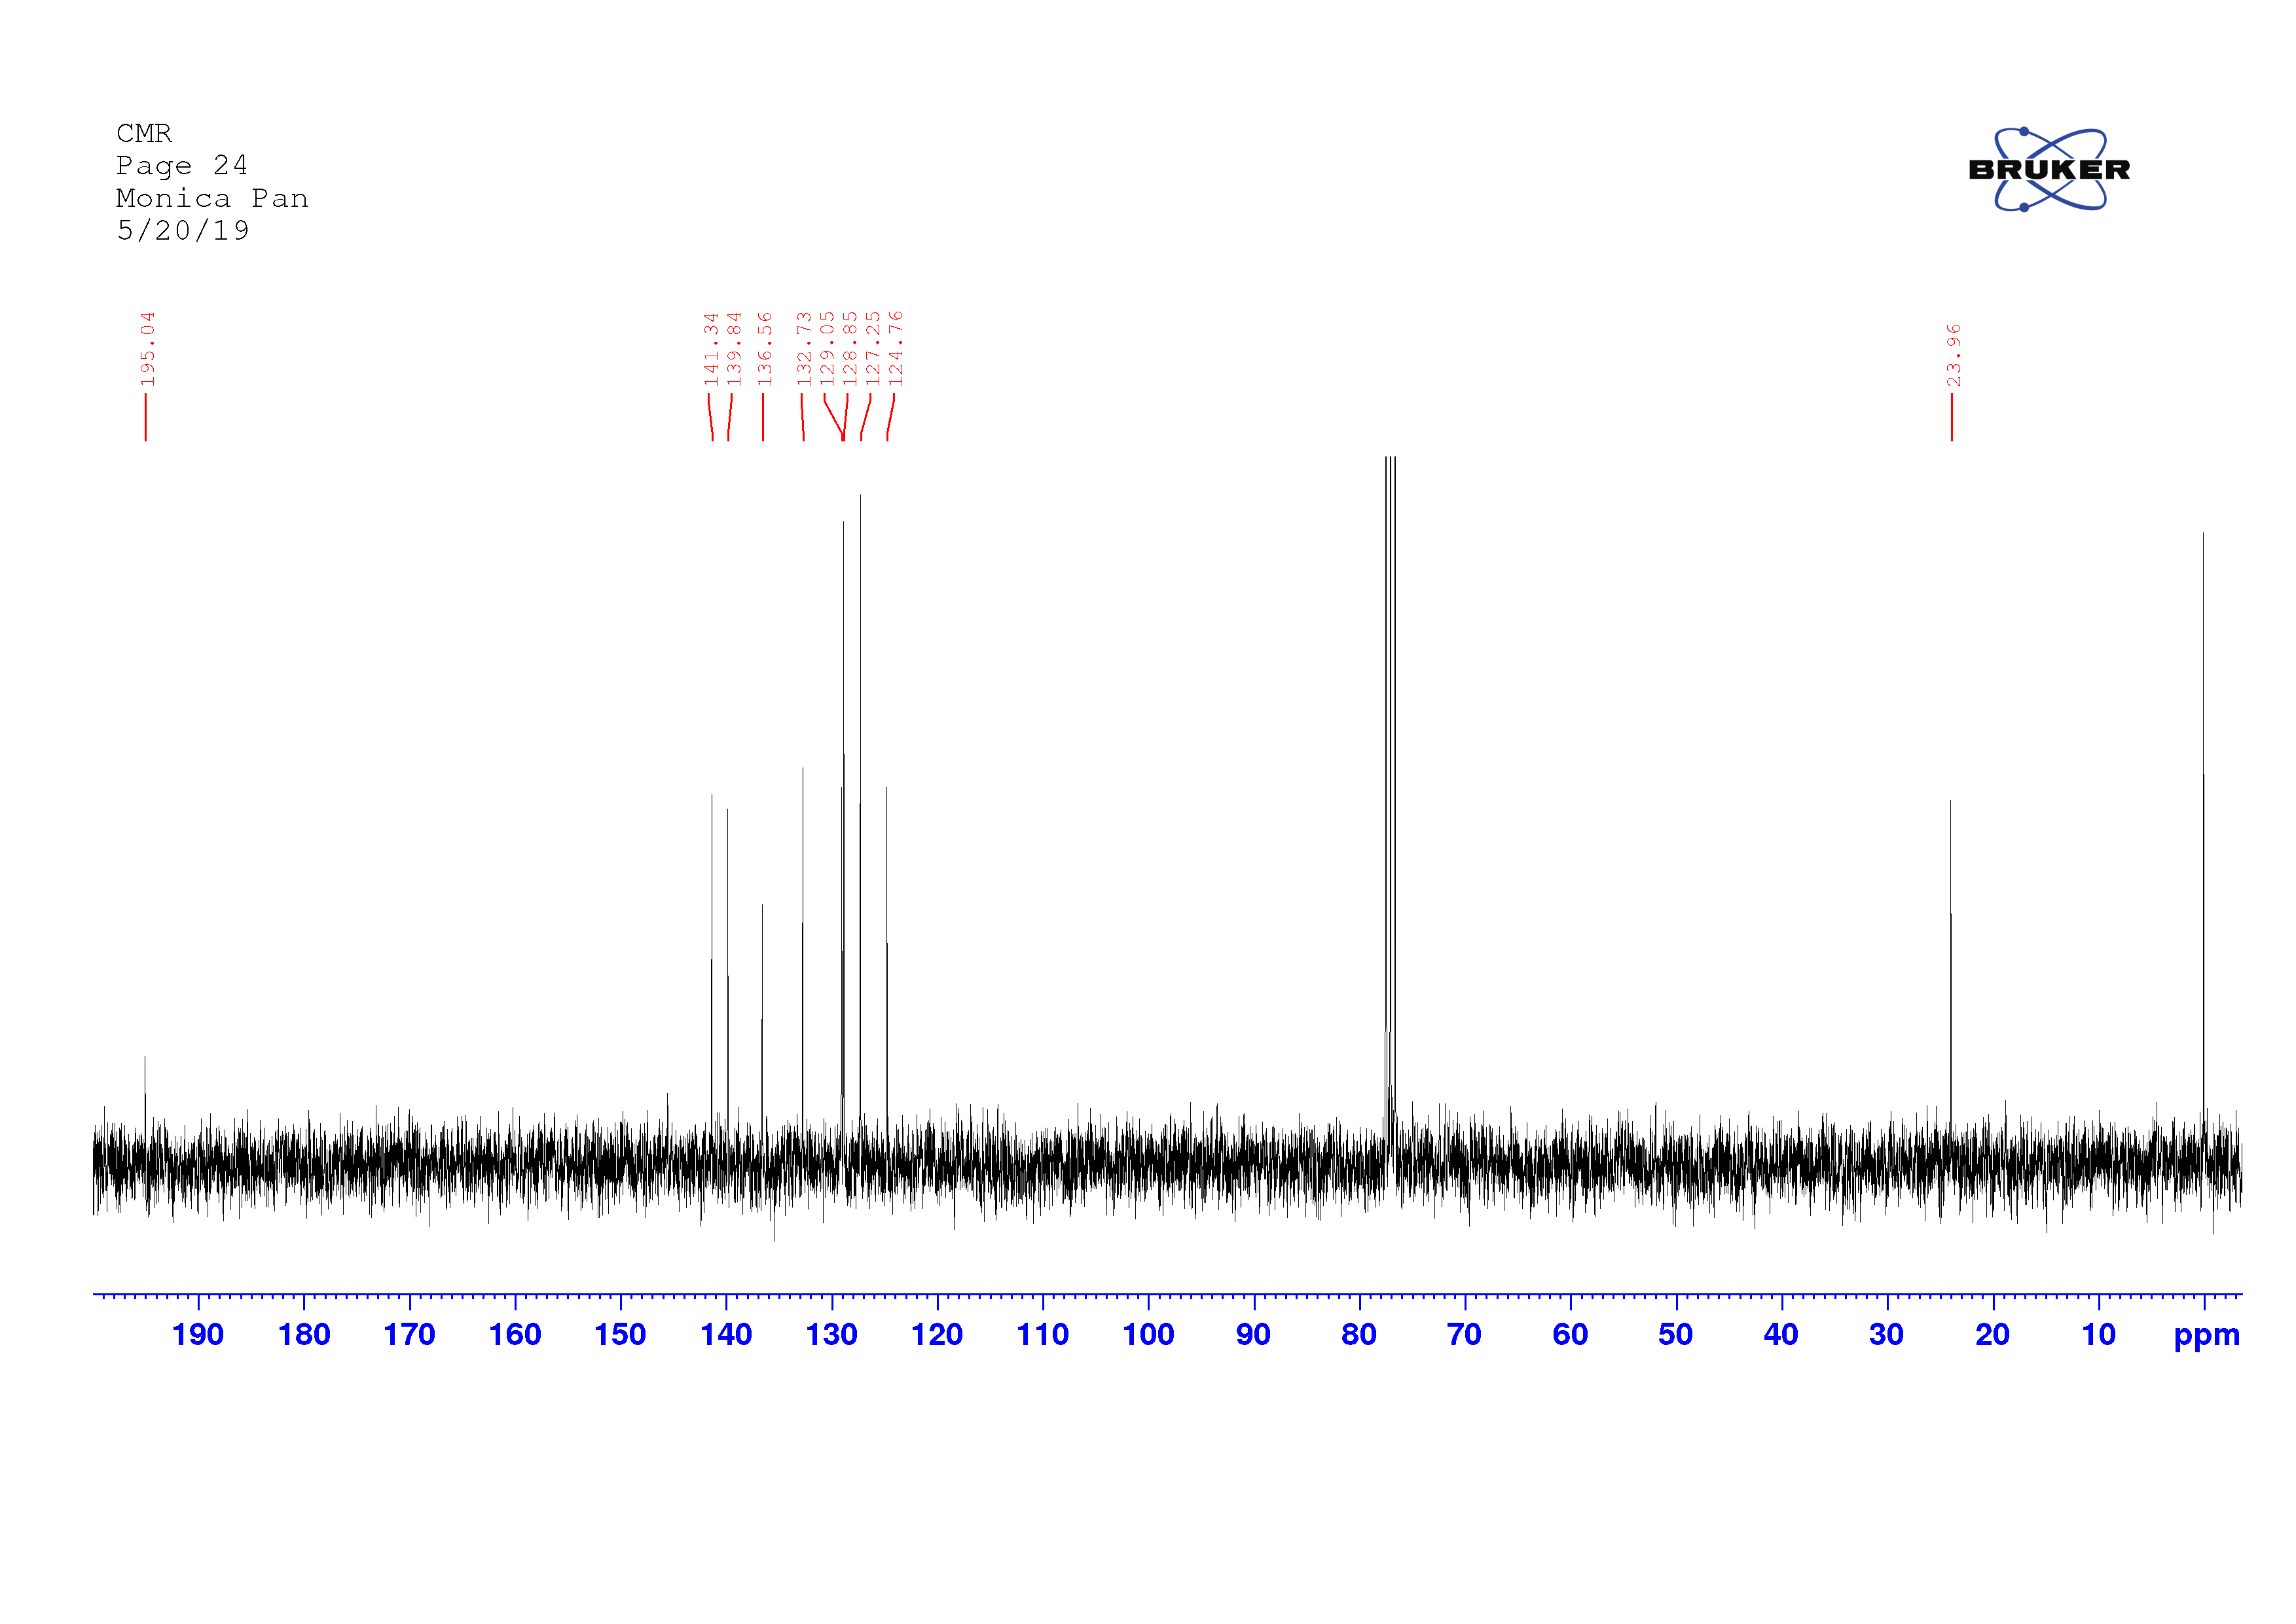
13C NMR:

8

5

6

4

10

7

9

2

3

1

***Figure 17a****. 13CNMR spectrum of (2E,5E)-2,5-bis[(2E)-3-phenylprop-2-en-1-ylidene]cyclopentan-1-one dissolved in chloroform-d.*

***Table 9a****. The chemical shifts (δC) for carbons present in*

*(2E,* *5E)-2,5-bis[(2E)-3-phenylprop-2-en-1-ylidene]cyclopentan-1-one, assigned using reference tables and ChemDraw estimations.*

| **Carbon** | **Mode** | **Chemical Shift (δC)** |
| --- | --- | --- |
| C1 | C=O | 195.04 |
| C2 | C=C | 139.84 |
| C3 | C=C | 141.34 |
| C4 | C=C | 124.76 |
| C5 | C=C | 136.56 |
| C6 | C=C | 132.73 |
| C7 | C=C | 128.85 |
| C8 | C=C | 129.05 |
| C9 | C=C | 127.25 |
| C10 | C-C | 23.96 |

Stacked NMR:

A

B

C

6

7

9

4

3

8

10

7

9

8

3

4

6

10

4

9

7

8

6

5

2

3

1


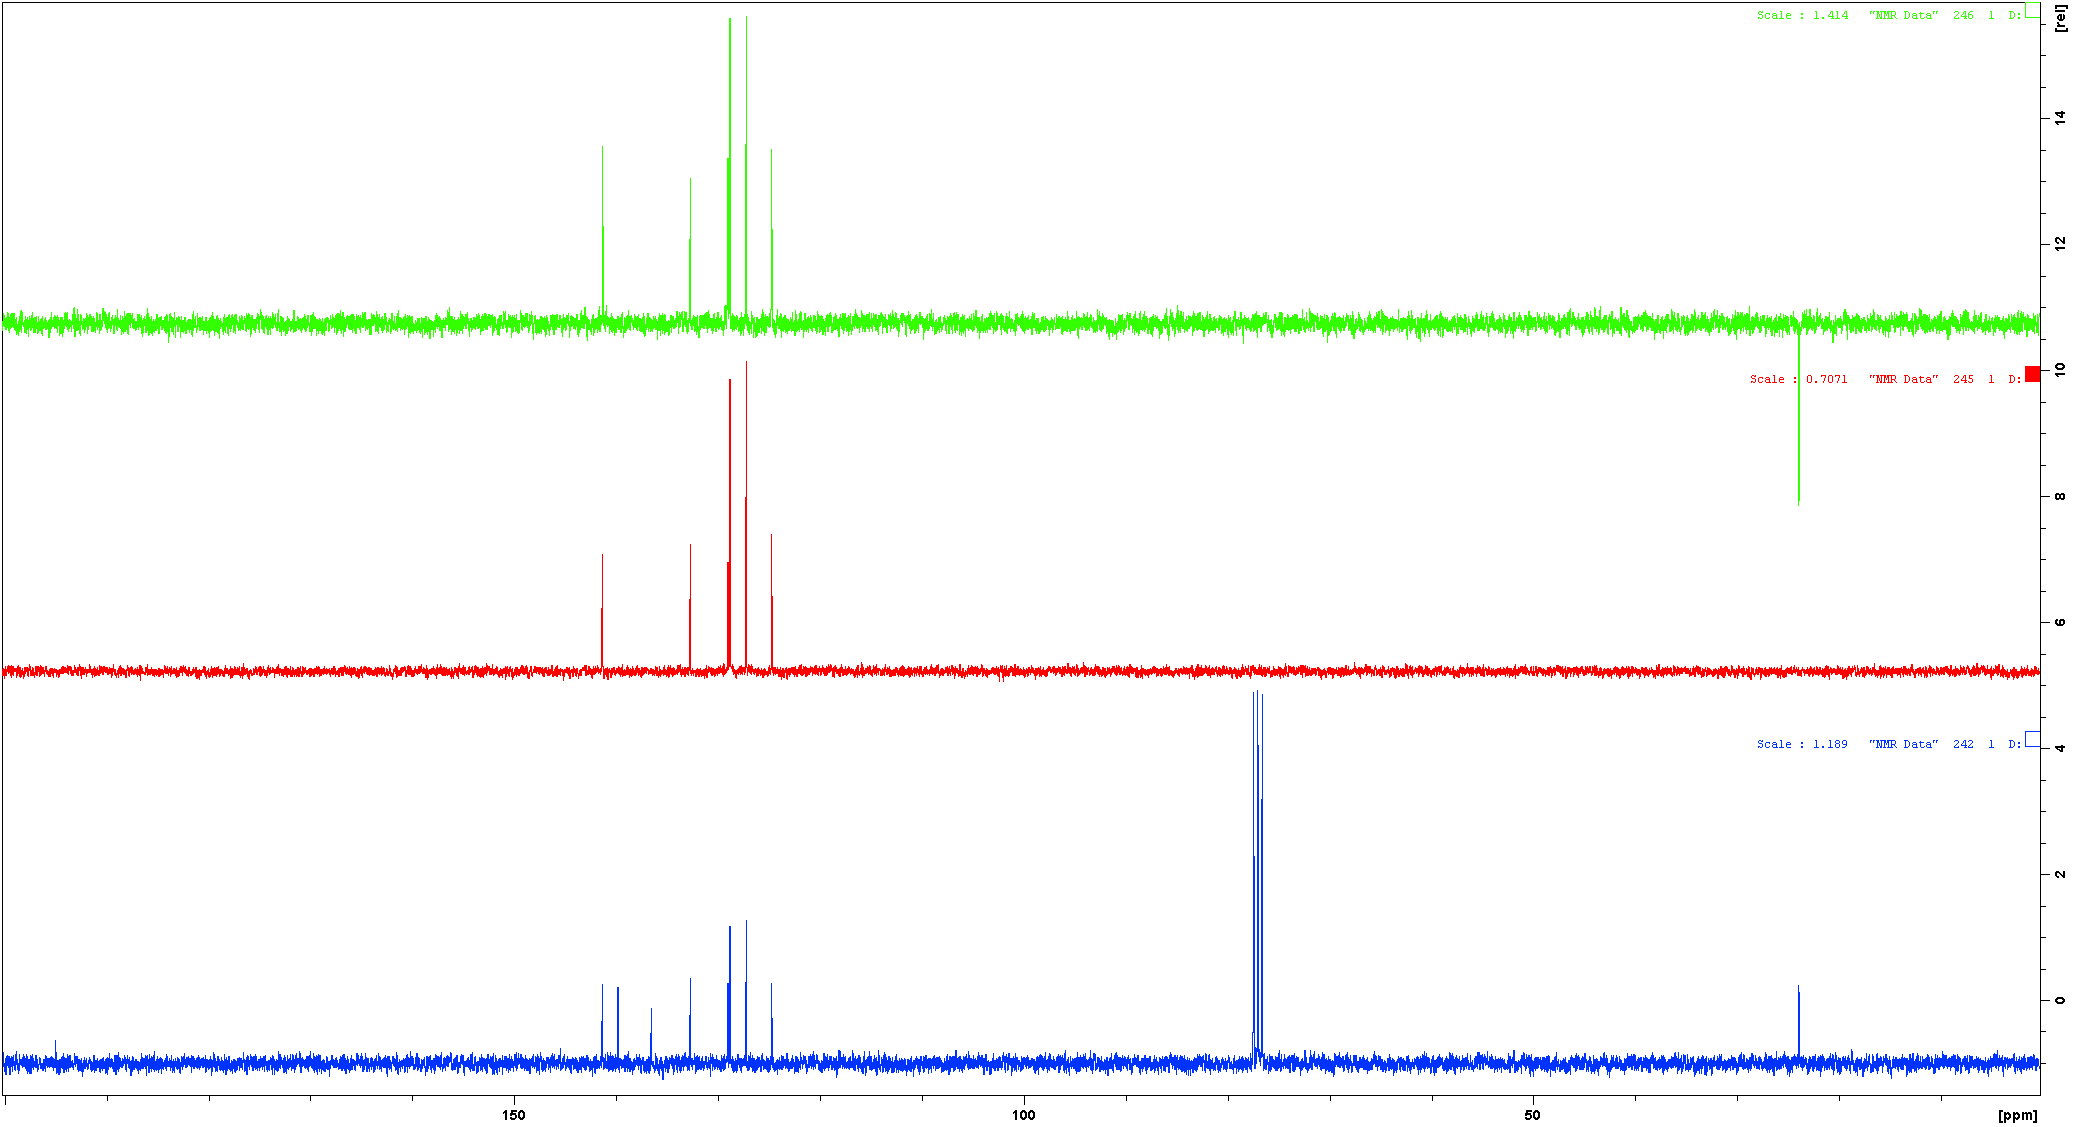
***Figure 18a****. Stacked NMR spectra of (2E,5E)-2,5-bis[(2E)-3-phenylprop-2-en-1-ylidene]cyclopentan-1-one dissolved in deuterated chloroform. Spectrum A (blue) represents 13C NMR, spectrum B (red) represents DEPT 90 NMR, and spectrum C (green) represents DEPT 135 NMR, where each peak was assigned using reference tables and ChemDraw estimations.*


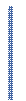
IR:

1609

***Figure 19a****. ATR-FTIR spectrum of (2E,5E)-2,5-bis[(2E)-3-phenylprop-2-en-1-ylidene]cyclopentan-1-one.*

| **Wavenumber (cm-1)** | **Vibrational Mode** |
| --- | --- |
| 3026 | C-H (alkene) |
| 1609 | C=O |
| 1580 | C=C |
| 972 | C=C (bending) |
| 685 | Benzene Derivative |

***Table 10a****. Wavenumber (cm-1) and the corresponding vibration mode for of (2E,5E)-2,5-bis[(2E)-3-phenylprop-2-en-1-ylidene]cyclopentan-1-one ATR-FTIR spectrum.*

UV Vis:

***Figure 20a****. UV absorbance spectrum of in 95% ethanol.*

**Bacterial Growth Spot Assay**

Triplicate 3 mL cultures of *P. aeruginosa* were first grown in Terrific Broth (TB) for 12-14 hours at 37 **°**C with shaking. The organic UV filters were dissolved in DMSO to create stock solutions of 20 mg/mL. Stock solutions were stored in the dark overnight at room temperature prior to mixing with bacterial cultures the following day.

Experimental samples were mixed in a 96-well plate. 20 μL of *P. aeruginosa* culture were added to every well in columns 1, 2, 4, and 5. 20 L TB was added to every well of column 3. Next, 20 μL TB culture media (column 1), DMSO solvent (column 2), 20 mg/mL UV organic UV filter compound (columns 3 and 4), and 50 mg/mL kanamycin antibiotic solution (column 5) were added to the first row of wells, in the 96-well plate. The first row of solutions combined in the first row were mixed twice before transferring 20 μL to the next row (row 2) using a multichannel pipette. This process was repeated (mixed row 2, transferred to row 3, and so on) to generate a 2-fold dilution series in the remaining wells down the column. 5 L of each dilution was then carefully placed on a tryptic soy agar plate previously warmed to 37 oC in an incubator. Images were collected for 6 hours at one hour intervals to monitor bacterial growth over time in the presence of various concentrations of potential UV filter compounds.

Table 12a details the final concentration of additives for each prepared well.

***Table 12a*.** Concentrations of solutions in the two-fold dilution series. Cells of the table correspond to the placement of spots on the tryptic soy agar culture plates.





Three trials were completed for each of the five synthesized compounds.

**Area Density Measures for Bacterial Growth in the Presence of Organic UV Filters**

Each bacterial growth spot assay plate was imaged under 365 nm epi illumination using a UVP BioSpectrum 810 Imaging System at one-hour intervals for six hours after initiating incubation at 37 **°**C. Area density values were measured from images of each plate using Life Science Vision Works LS Image Acquisition and Analysis Software version 8.1.2. Area density comparisons were completed after subtracting the background measurement from an empty, unspotted area of tryptic soy agar to account for plate variability due to agar thickness. Values were then normalized to percent maximum area density, after assigning the 100% value to optimal bacterial growth combined with TB culture media alone (column 1).

Double reciprocal plots to assess inhibition type used the inverse percent dilution of stocks as the independent variable.

Inverse percent dilution = 1 / (% dilution)

The inverse less percent area density was used as the dependent variable. It measured the inverse of unrealized area density due to inhibition by kanamycin, DMSO and/or UV filters.

Inverse less percent area density = 1 / [(% area density TB+) - (% area density sample)]

The inverse less percent maximum area density substituted for the inverse of velocity of traditional Lineweaver-Burk plots by comparing values collected at a constant time.

**Selecting the Dilution to Study Bacteria in the Exponential Growth Phase**

Bacterial growth typically follows early exponential growth eventually reaching a plateau due to contact inhibition and limited nutrient availability. Therefore, the first analysis of area density data looked for a working set of dilutions where distinctions between conditions could be detected during the exponential growth phase. To determine the best dilution at which to compare bacterial growth over time, background subtracted area densities for 5 hours of incubation were arbitrarily chosen for direct comparison (Figure 21a). While compounds 3, 4, and 5 exhibited almost no false positive indication of bacterial growth due to epi illumination at 365 nm, compounds 1 and 2 had moderate-to-high measures of false positive bacterial growth-like area densities (UV compound + DMSO -). These results were consistent with UV-Vis spectra for the organic UV filters, as shown in Figure 3, which indicated wavelength maxima nearest 365 nm for compound 2, with the maxima for compound 1 also much closer to 365 nm compared to compounds 3, 4, and 5. Regardless, the fourth dilution of data for compounds 1 and 2 indicated a point at which true bacterial growth (UV Compound + DMSO +) exceeded mean false positive area densities due to the presence of UV filter compound alone (UV Compound + DMSO -).


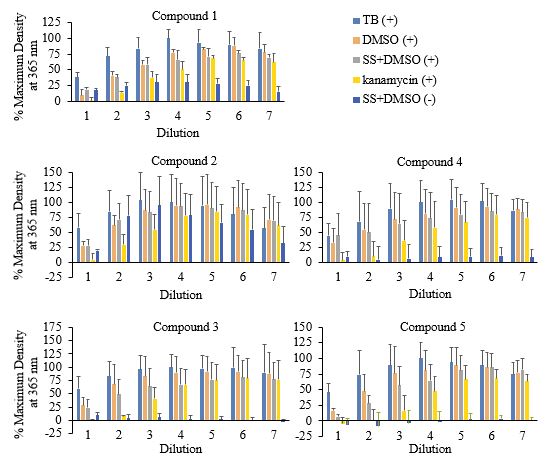


***Figure 21a*.** Concentration analysis of bacterial growth. Percent maximum mean area densities (n=3) indicating *P. aeruginosa* after five hours of incubation at 37 oC for all dilutions of TB combined with *P. aeruginosa* culture (light blue, TB +), DMSO combined with *P. aeruginosa* (red, DMSO +), compound dissolved in DMSO combined with *P. aeruginosa* (gray, UV Compound + DMSO +), kanamycin combined with *P. aeruginosa* (yellow, kanamycin +) and compound combined with DMSO in the absence of *P. aeruginosa* (dark blue, UV Compound + DMSO -).

**Kinetic Modeling to Determine Inhibition Type for UV Filter Compounds 3 and 5**

Since bacterial growth of *P. aeruginosa* was diminished in the presence of compounds 3 and 5 in the time course assay, graphical models of inhibition were generated using double reciprocal values for dilutions and less maximum percent area density (Figure 22a). The reciprocal of less maximum percent area density was based on microscopic images of the organic UV filter compounds (Figure 2(B)), that suggested the organic compounds may have constituted a physical barrier to bacterial growth on the agar surface and, in effect, limited niche availability within the spot. Essentially, the graphical model was based on a reduced area in the spot that the bacteria could inhabit at varied concentrations using reciprocal values. For both compounds 3 and 5, the highest three or four concentrations for conditions that included bacterial culture were directly compared at two time points of incubation, t = 3 and t = 5 hours. All graphs supported increased inhibition of bacterial growth in the presence of the organic UV filters 3 and 5 beyond DMSO solvent alone. Intersecting trend lines supported that inhibition by these organic UV filters at higher dilutions was either competitive or mixed in nature.

Since limited data sets were used in this analysis, additional work to include several concentrations at which compounds might be used in sunscreens should be done. The concentration gradient aspect of the time course assays allowed for the inhibiting effects of the UV filter to be gauged. Since the calculated molar absorptivity for compound 5, for example, was 54,426 L∙mol-1∙cm-1, which greatly exceeds the molar absorptivity of common commercial UV filters (~20,000 L∙mol-1∙cm-1), a smaller concentration of the filter is required when incorporating into topical sunscreens. Limiting the concentration of compound 5, for example, would also limit the weak inhibiting effects of the UV filter on skin bacteria such as *P. aeruginosa*. Further analysis is required to determine the concentrations that are both effective at absorbing UV radiation and maintains the balance of healthy microbes present on the epidermis. Furthermore, cellular effects regulating bacterial growth should be investigated to ensure inhibition by compound 3 and compound 5 is merely physical.


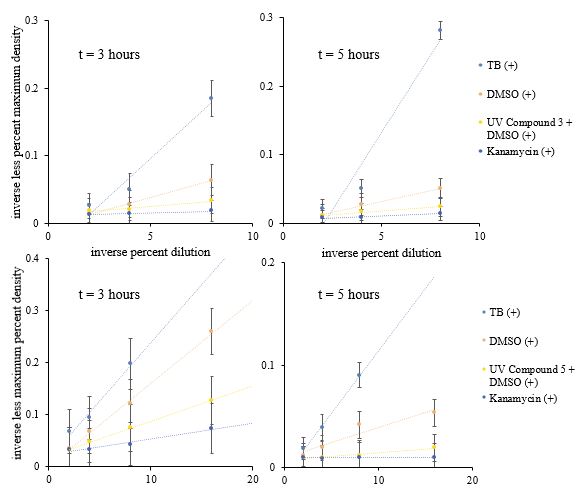


***Figure 22a.*** Double reciprocal plots for conditions assessing bacterial growth in the presence of UV filter compound 3 (top two graphs) and compound 5 (bottom two graphs) at t=3 (left) and t=5 (right) hours. Growth inhibition is shown that cannot be fully accounted for by the solvent DMSO alone, indicating inhibition by the two organic UV filters. Graphs were generated using the highest three or four concentrations (50% to 6.25%) used in the bacterial growth spot assays.
